# Supplementary material for: Charge transfer facilitated direct electrophilic substitution in phenylaminonaphthoquinones: experimental, theoretical and electrochemical studies
Source: Royal Society of Chemistry journal article supplement (doi:10.1039/c3nj01228j), 2014-01-01
Supplement: c3nj01228j.pdf [file c3nj01228j.pdf]

## SUPPORTING INFORMATION

### **Charge transfer facilitated direct electrophilic substitution in phenylaminonaphthoquinones: Experimental, theoretical and electrochemical studies**

A. Satheshkumar, K. Ganesh and Kuppanagounder P. Elango\*

|                                                                                | Page No. |
|--------------------------------------------------------------------------------|----------|
| 1. Job's plot .....                                                            | S2       |
| 2. Frontier molecular orbitals of ( <b>1a-e</b> ) and ( <b>1a-e</b> -HMB)..... | S3-S6    |
| 3. Cyclic voltammogram of <b>3a</b> .....                                      | S7       |
| 4. Zone of inhibition for <i>Staphylococcus aureus</i> .....                   | S8       |
| 5. Mulliken charges on C-atoms of <b>1a-e</b> .....                            | S9       |
| 6. Mulliken charges on C-atoms of ( <b>1a-e</b> ) with HMB .....               | S9       |
| 7. Zones of inhibition (mm) of the compounds at 100µl .....                    | S10      |
| 8. NMR spectra of all reactants and products.....                              | S11- S47 |

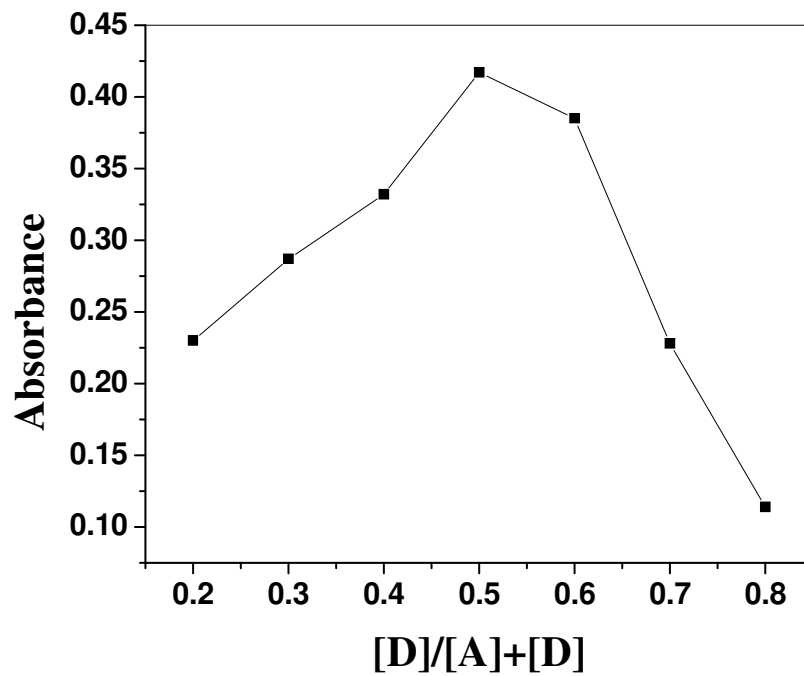

Figure S1 : Job's continuous variation plot for **1a** with HMB

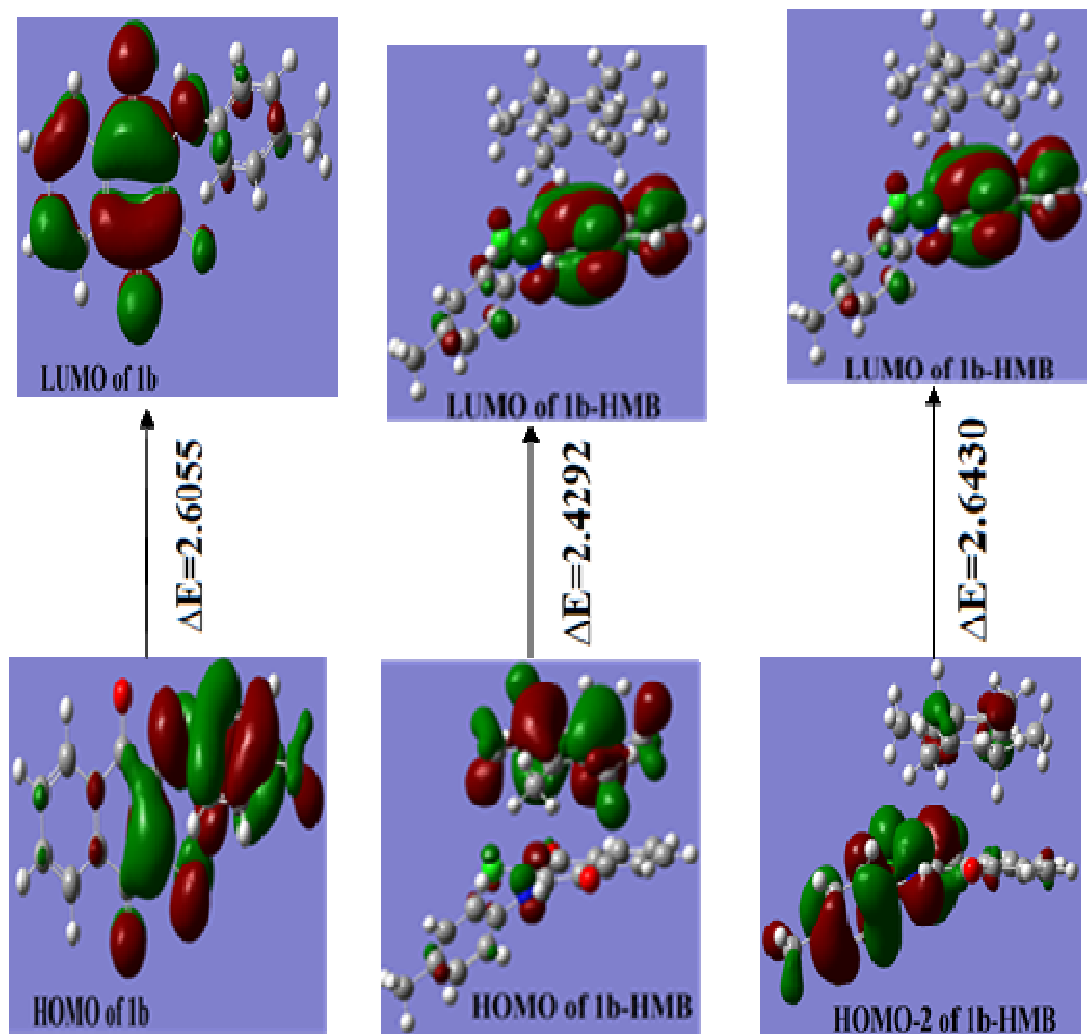

Figure S2 : Frontier molecular orbitals of **1b** and **1b-HMB** and their  $\Delta E$  values.

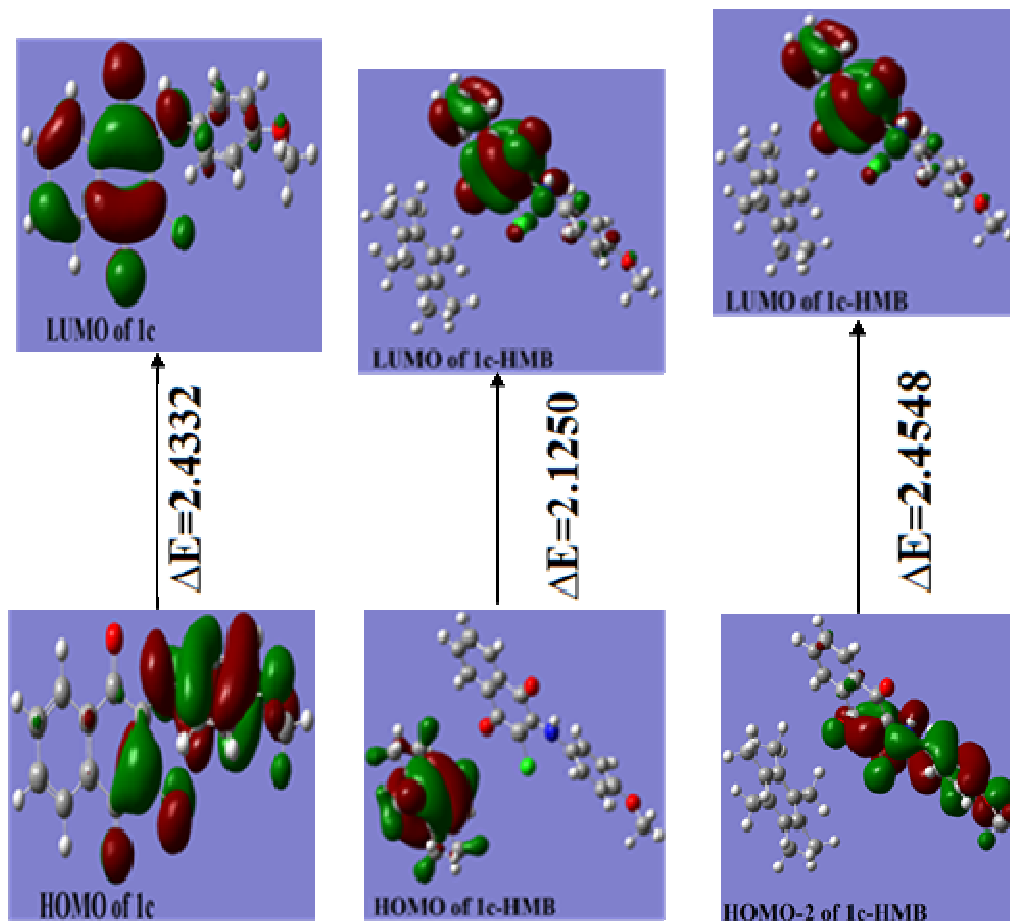

Figure S3 : Frontier molecular orbitals of **1c** and **1c-HMB** and their  $\Delta E$  values.

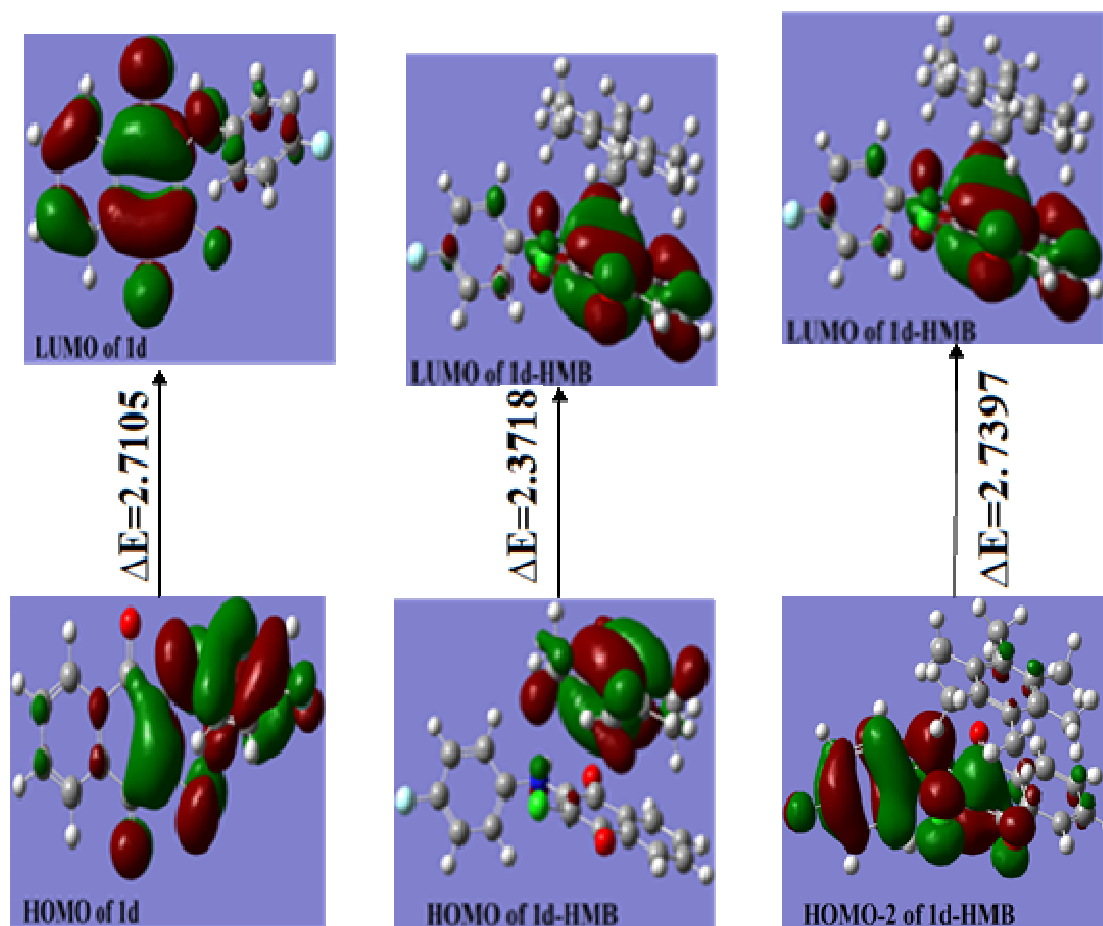

Figure S4 : Frontier molecular orbitals of **1d** and **1d-HMB** and their  $\Delta E$  values.

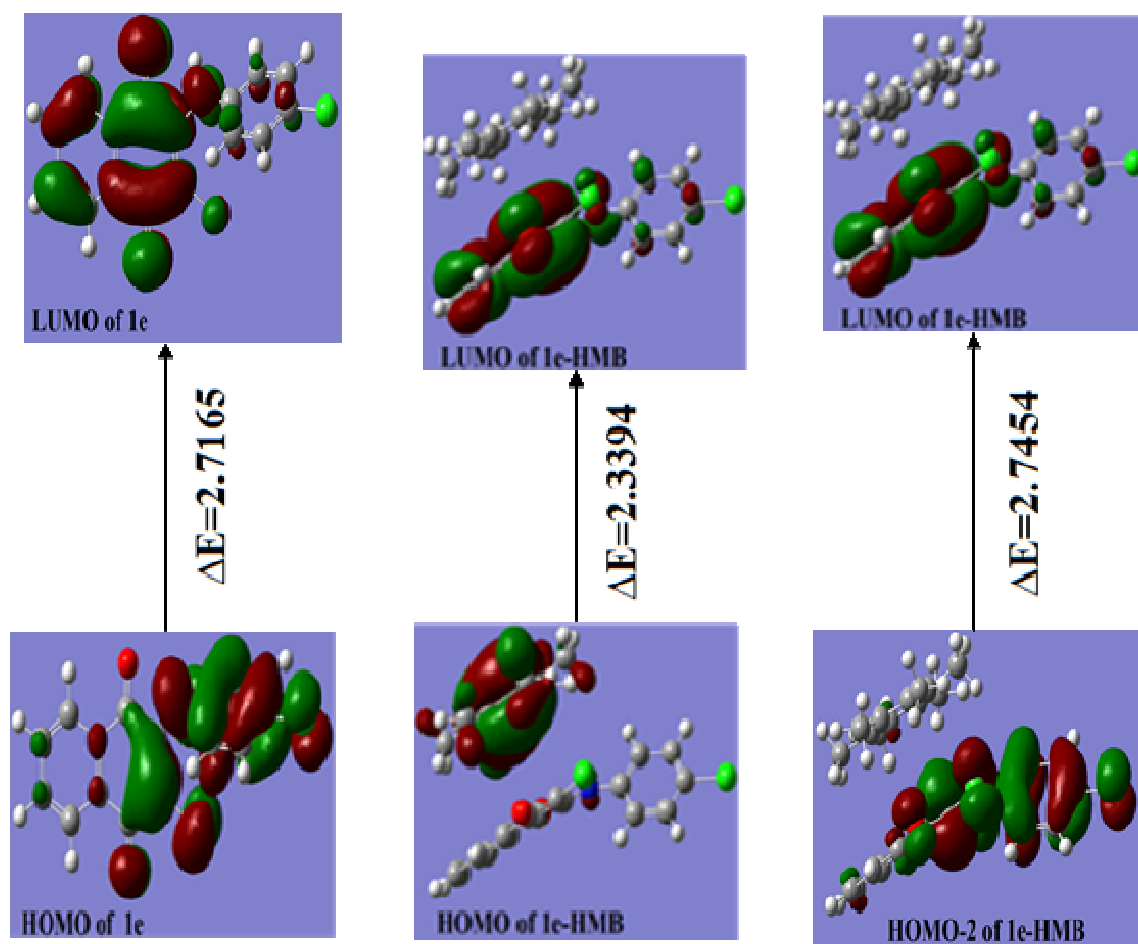

Figure S5 : Frontier molecular orbitals of **1e** and **1e-HMB** and their  $\Delta E$  values.

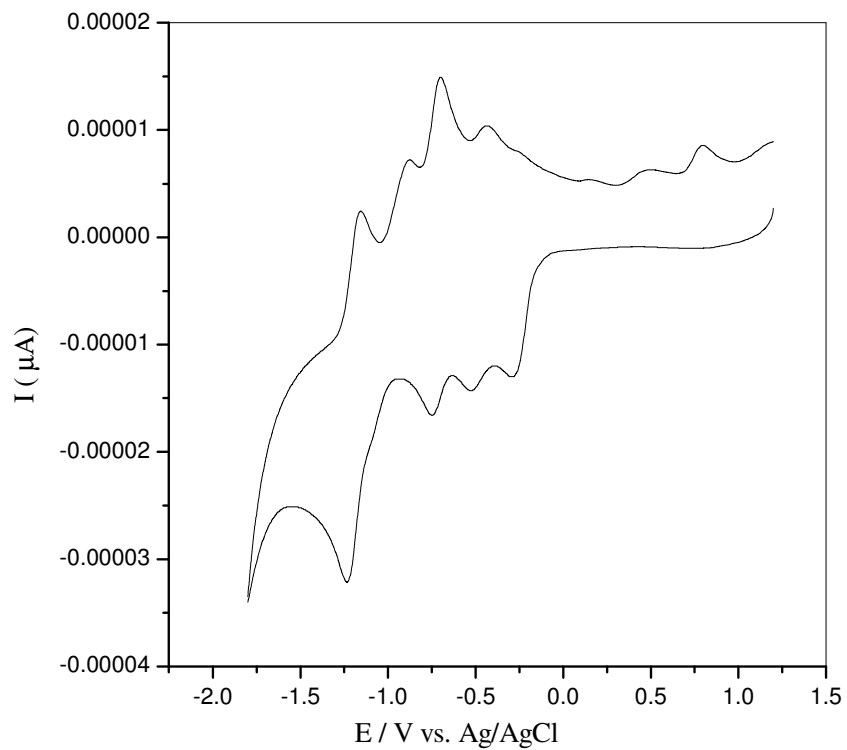

Figure S6. Cyclic voltammogram of 1 mM **3a** in 0.1 M tetrabutyl ammonium perchlorate in ACN obtained in glassy carbon electrode scan rate 100 mV/s.

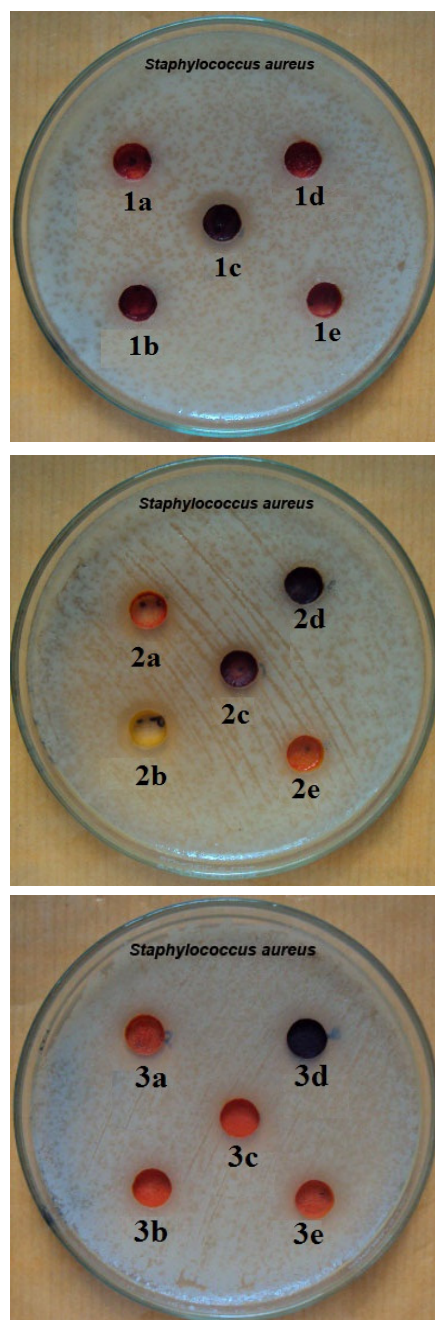

Figure S7: Zone of inhibition for *Staphylococcus aureus* (Compound labeled as Table S3).



**Table S1** Mulliken charges at B3LYP/6-31G Level on the C-atoms of **1a-e**

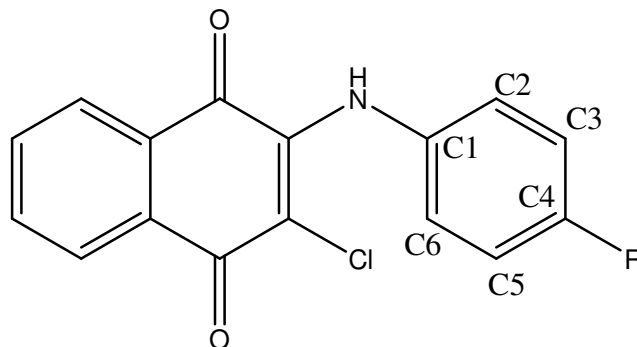

| R   | N      | C1    | C2     | C3     | C4     | C5     | C6     |
|-----|--------|-------|--------|--------|--------|--------|--------|
| Me  | -0.831 | 0.294 | -0.135 | -0.167 | 0.126  | -0.176 | -0.079 |
| OMe | -0.831 | 0.296 | -0.140 | -0.135 | 0.294  | -0.154 | -0.093 |
| H   | -0.83  | 0.294 | -0.136 | -0.138 | -0.110 | -0.148 | -0.08  |
| Cl  | -0.832 | 0.301 | -0.133 | -0.11  | -0.225 | -0.12  | -0.076 |
| F   | -0.832 | 0.296 | -0.137 | -0.151 | 0.298  | -0.161 | -0.081 |

**Table S2** Mulliken charges at B3LYP/6-31G Level on the C-atoms of (**1a-e**) with HMB

CTadduct

| R   | N      | C1    | C2     | C3     | C4     | C5     | C6     |
|-----|--------|-------|--------|--------|--------|--------|--------|
| Me  | -0.833 | 0.292 | -0.140 | -0.169 | 0.126  | -0.176 | -0.080 |
| OMe | -0.830 | 0.289 | -0.144 | -0.145 | 0.299  | -0.154 | -0.083 |
| H   | -0.830 | 0.289 | -0.139 | -0.134 | -0.114 | -0.158 | -0.089 |
| Cl  | -0.832 | 0.303 | -0.138 | -0.110 | -0.226 | -0.120 | -0.077 |
| F   | -0.836 | 0.298 | -0.142 | -0.151 | 0.297  | -0.161 | -0.081 |

**Table S3** Zones of inhibition (mm) of the compounds at 100µl

| Test Organisms                | 1a                       | 1b | 1c | 1d | 1e | 2a | 2b | 2c | 2d | 2e | 3a | 3b | 3c | 3d | 3e | Contro<br>l<br>(DMS<br>O) |
|-------------------------------|--------------------------|----|----|----|----|----|----|----|----|----|----|----|----|----|----|---------------------------|
|                               | Zone of Inhibition in mm |    |    |    |    |    |    |    |    |    |    |    |    |    |    | -                         |
| <i>Staphylococcus aureus</i>  | 11                       | -  | 14 | -  | -  | 12 | 13 | 11 | -  | -  | 13 | 10 | 14 | 13 | 12 | -                         |
| <i>Streptococcus mutans</i>   | 16                       | 18 | 14 | 13 | -  | 14 | 14 | 15 | 15 | 11 | 18 | -  | 14 | -  | 14 | -                         |
| <i>Pseudomonas aeruginosa</i> | -                        | -  | -  | -  | -  | -  | -  | -  | -  | -  | 13 | -  | 14 | 11 | 16 | -                         |
| <i>Escherichia coli</i>       | -                        | -  | -  | -  | -  | 14 | 16 | 17 | 13 | 14 | 15 | -  | -  | -  | -  | -                         |
| <i>Klebsiella pneumoniae</i>  | -                        | -  | -  | -  | -  | -  | -  | -  | -  | -  | -  | -  | 13 | -  | -  | -                         |

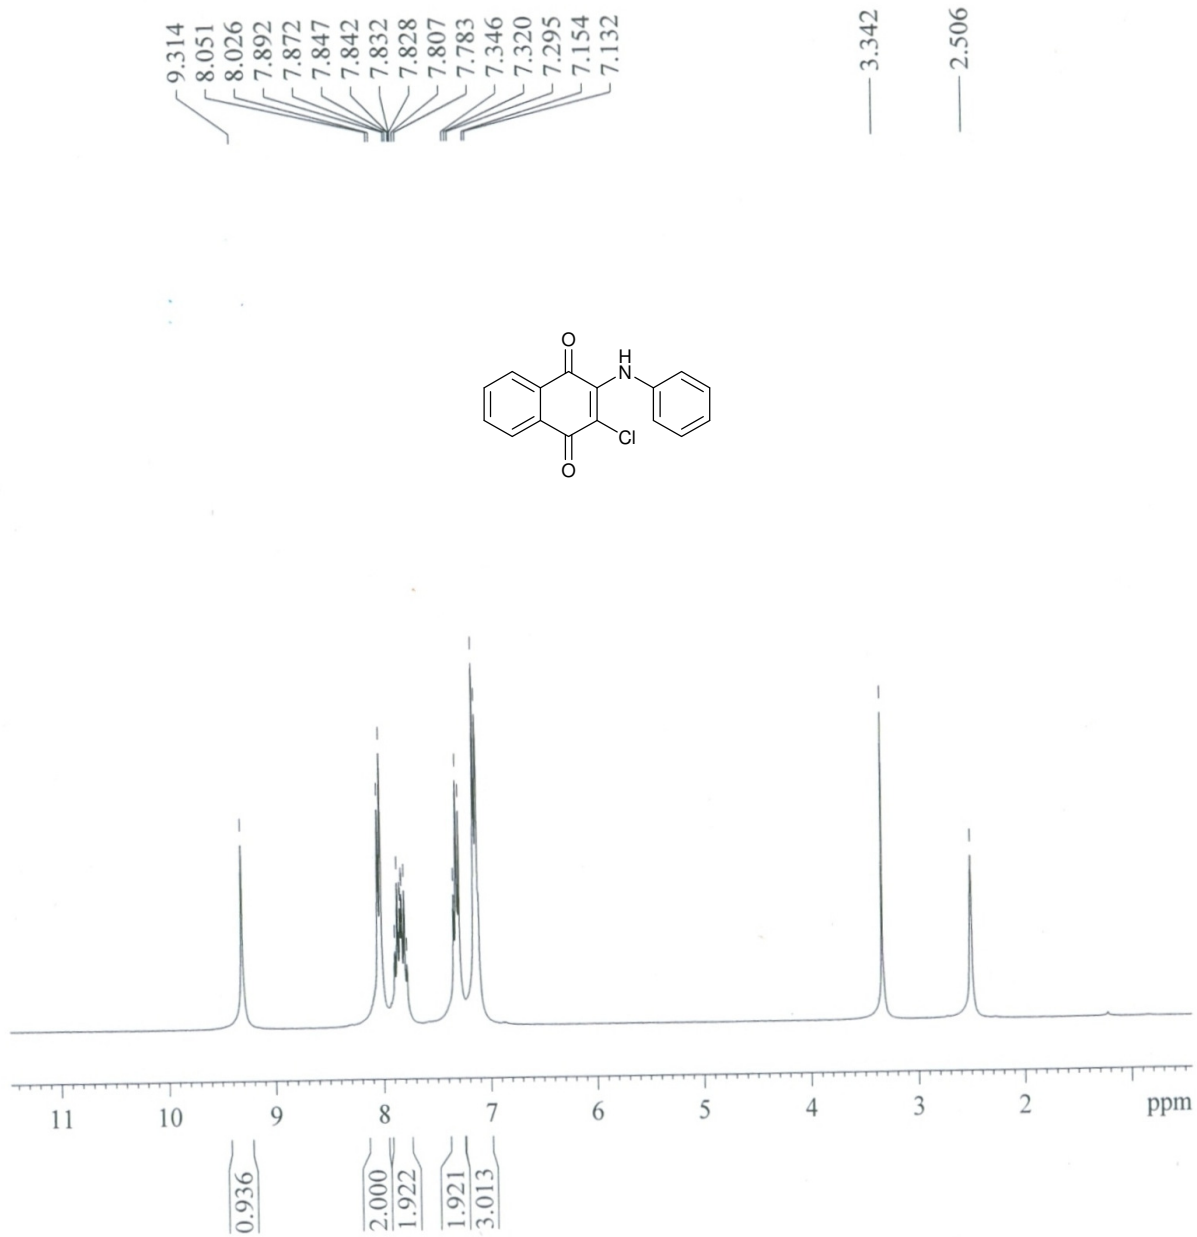

<sup>1</sup>H NMR for **1a**

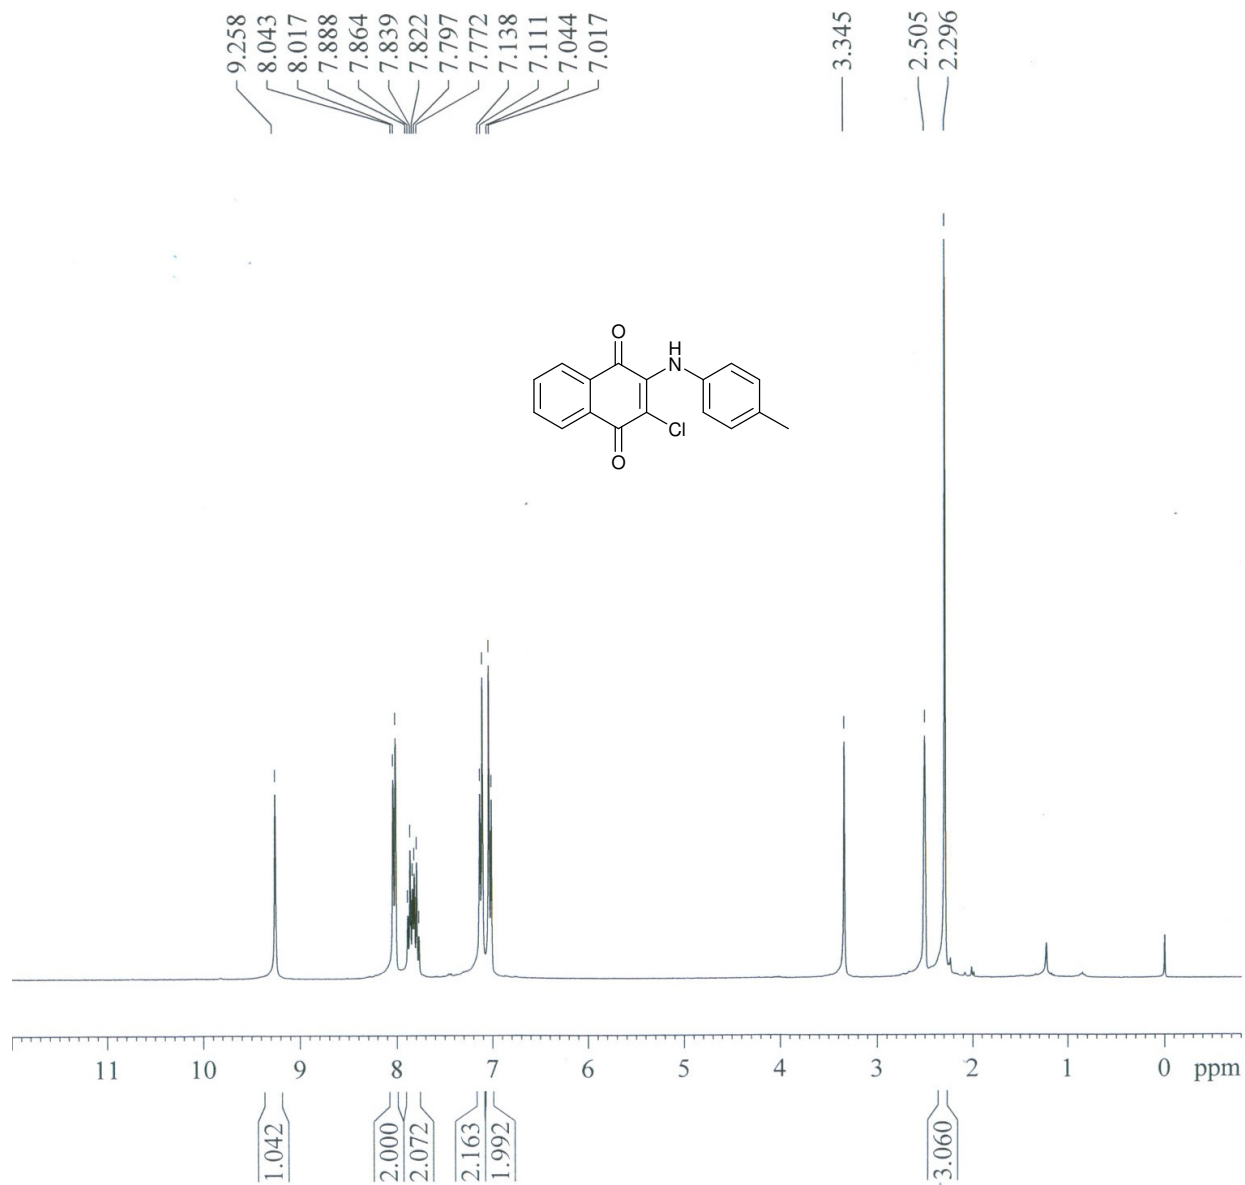

<sup>1</sup>H NMR for **1b**

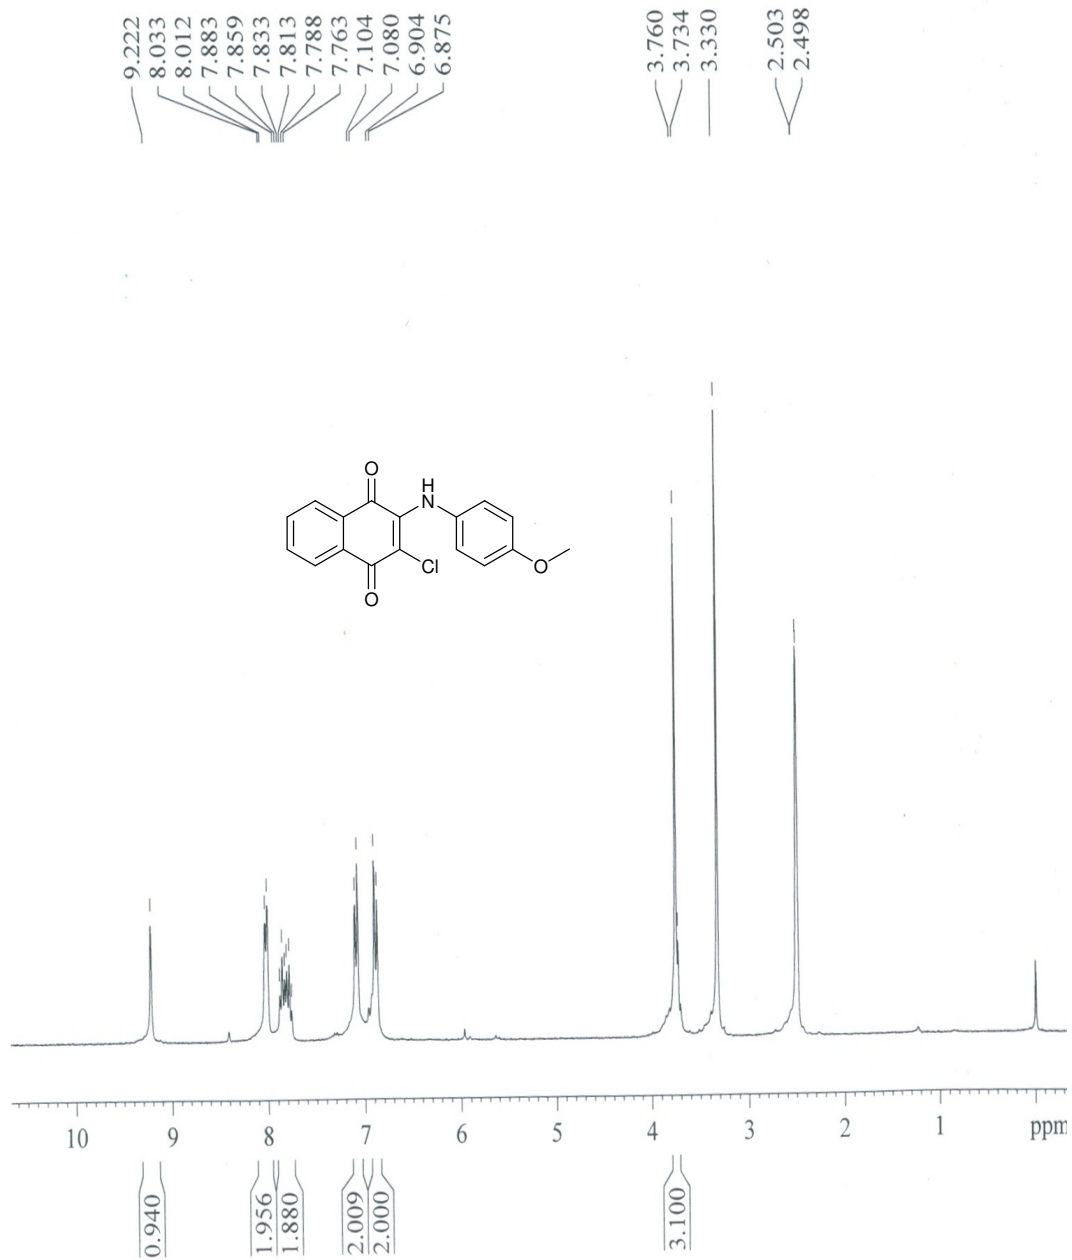

$^1\text{H}$  NMR for **1c**

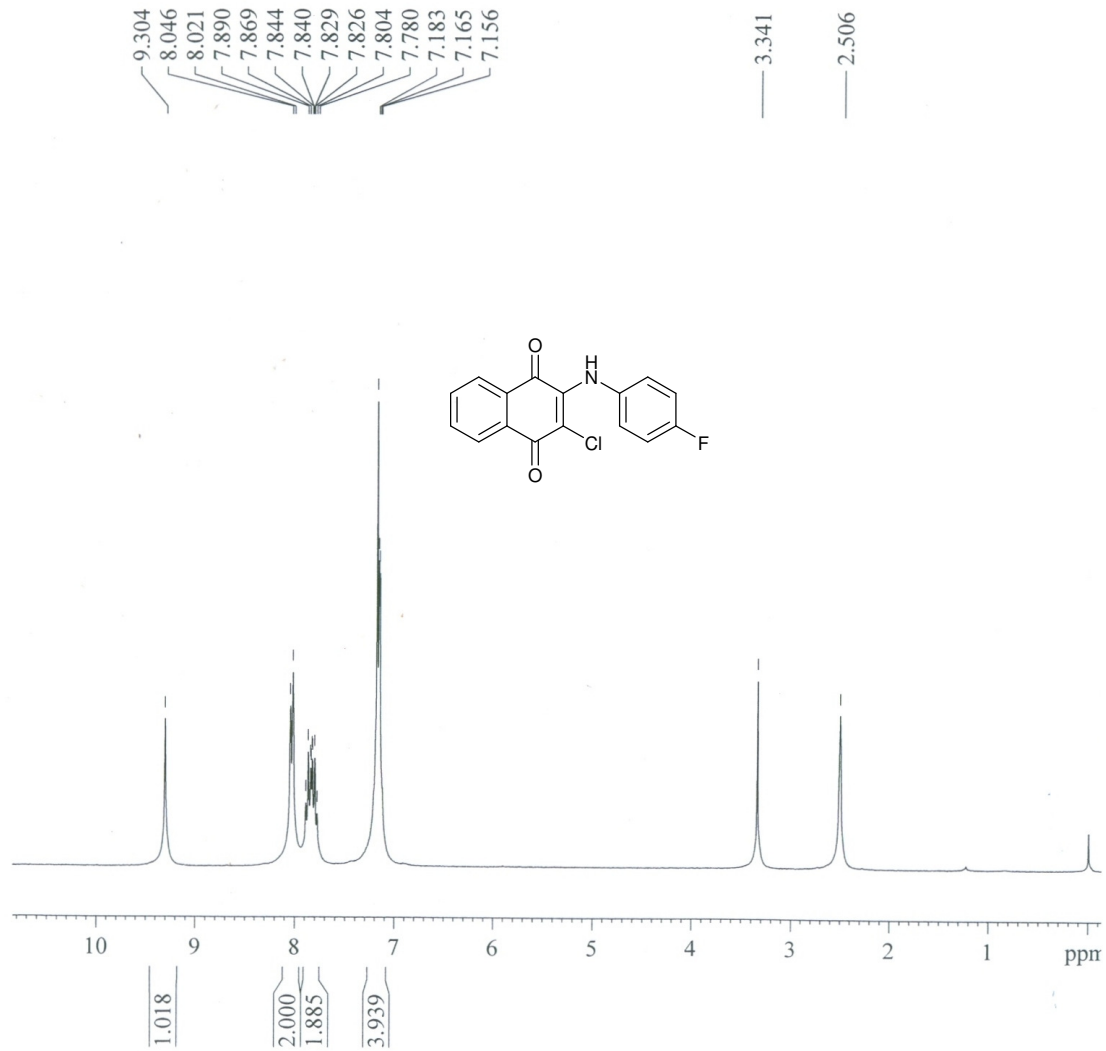

<sup>1</sup>H NMR for **1d**

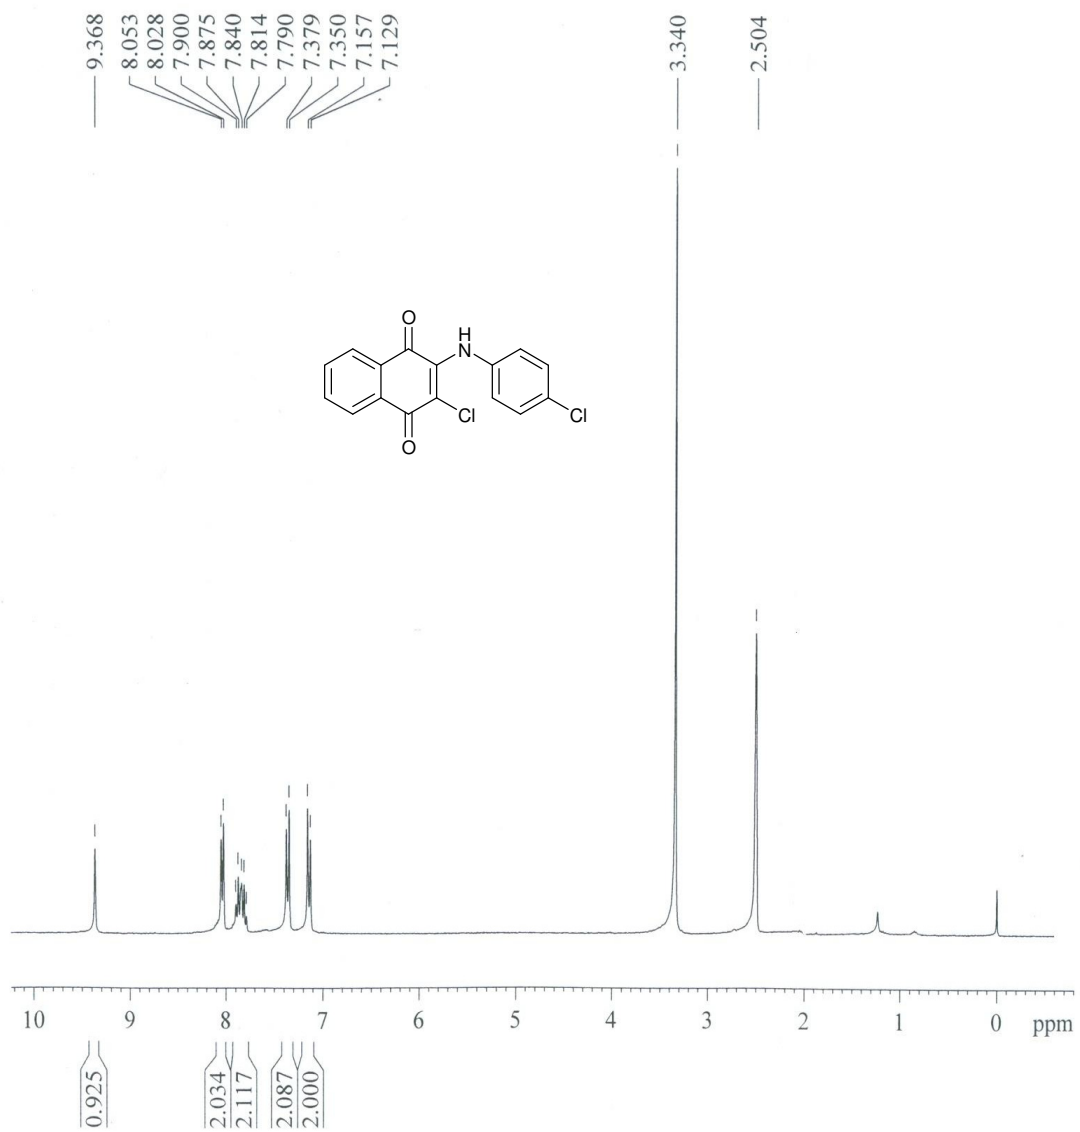

$^1\text{H NMR}$  for **1e**

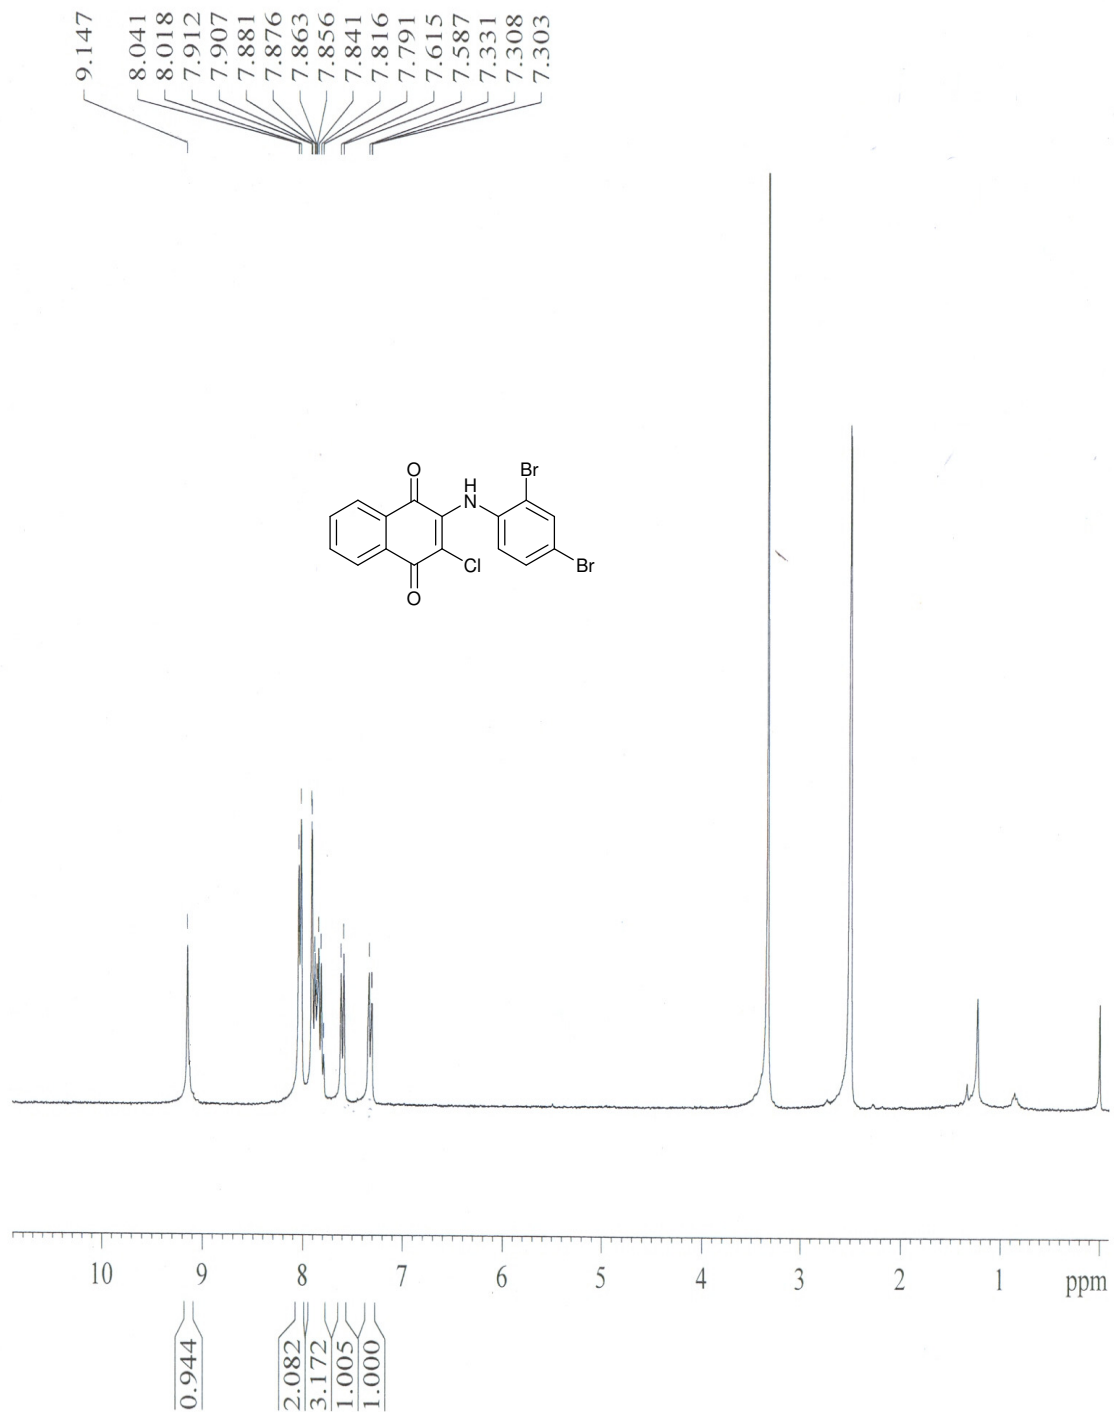

$^1\text{H}$  NMR for **2a**



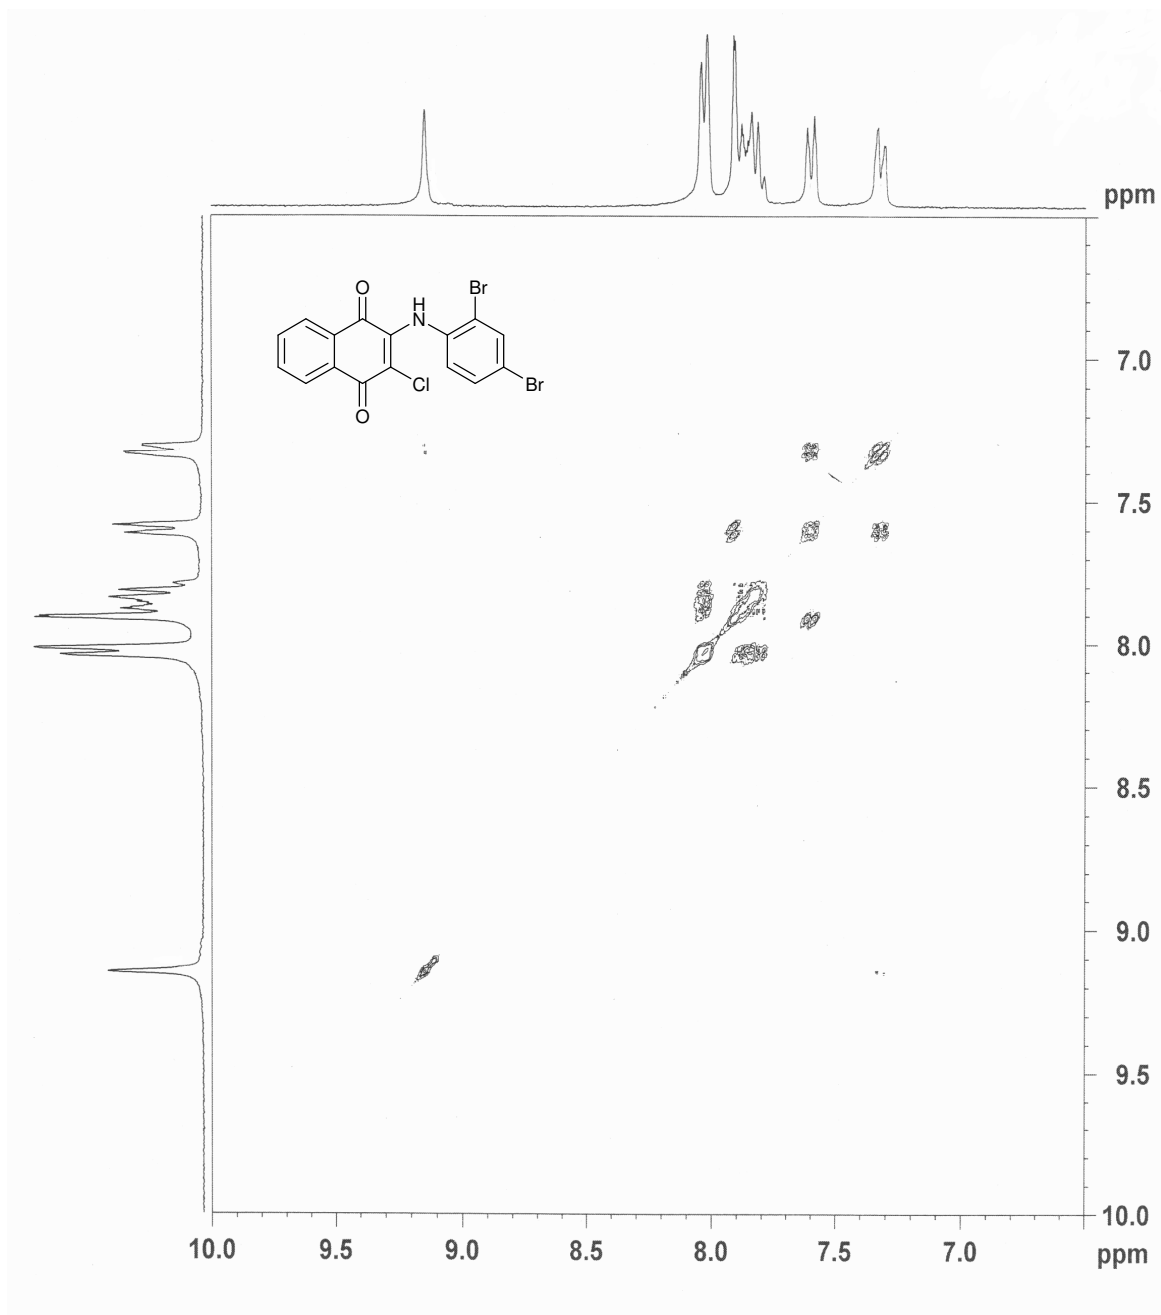

$^1\text{H}$ - $^1\text{H}$  Cosy for **2a**

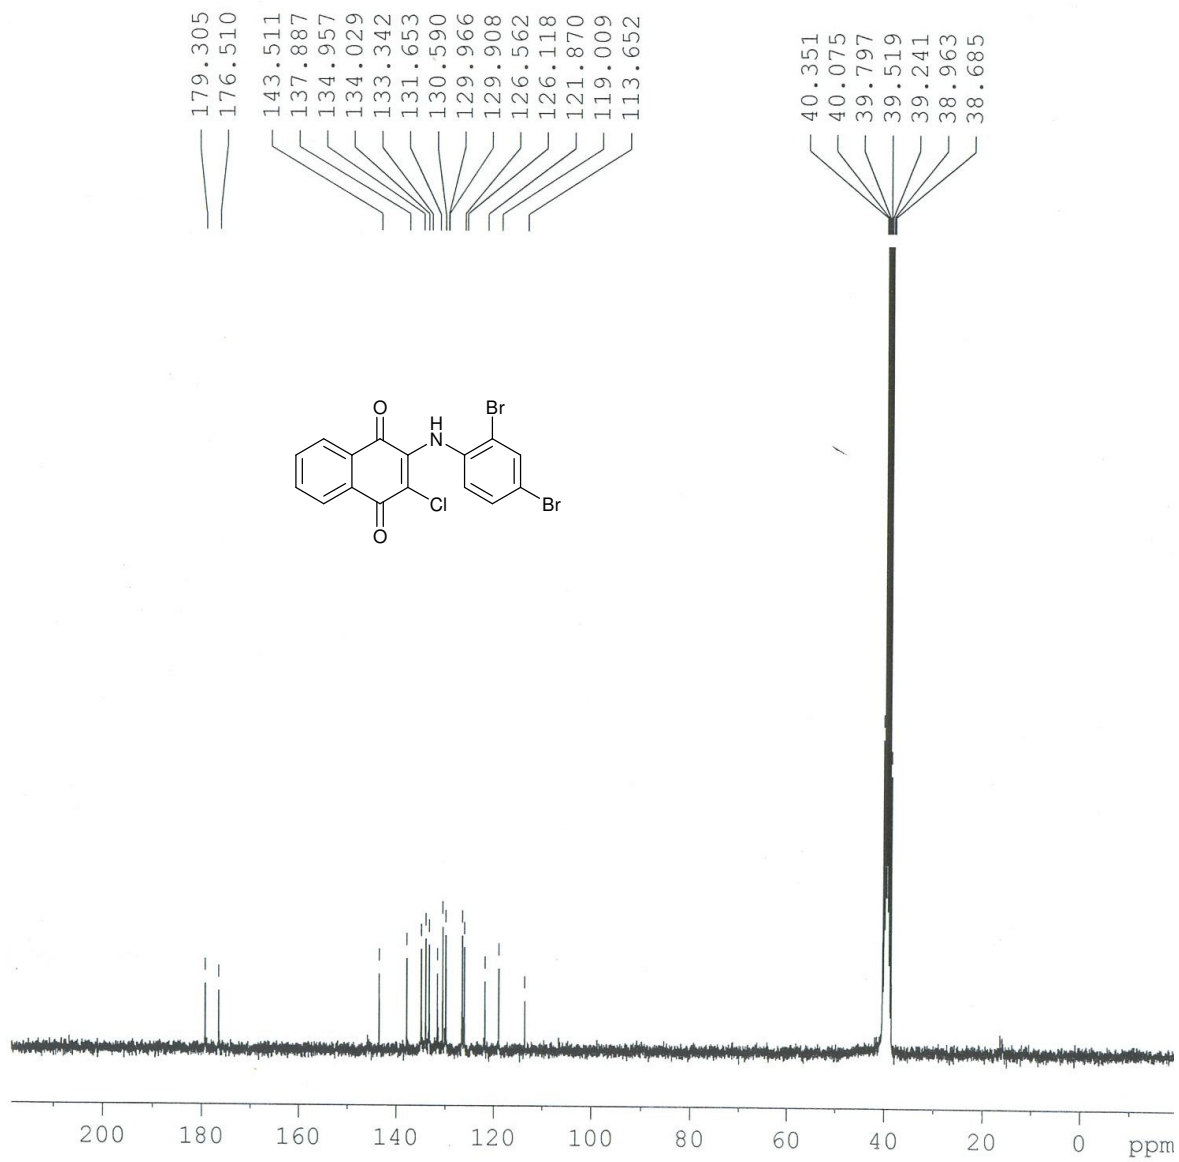

<sup>13</sup>C NMR for **2a**

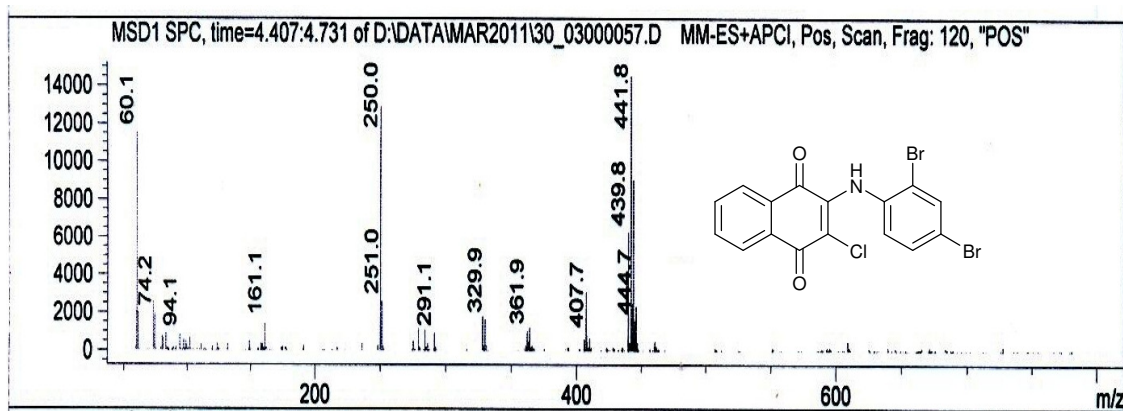

LCMS for **2a**

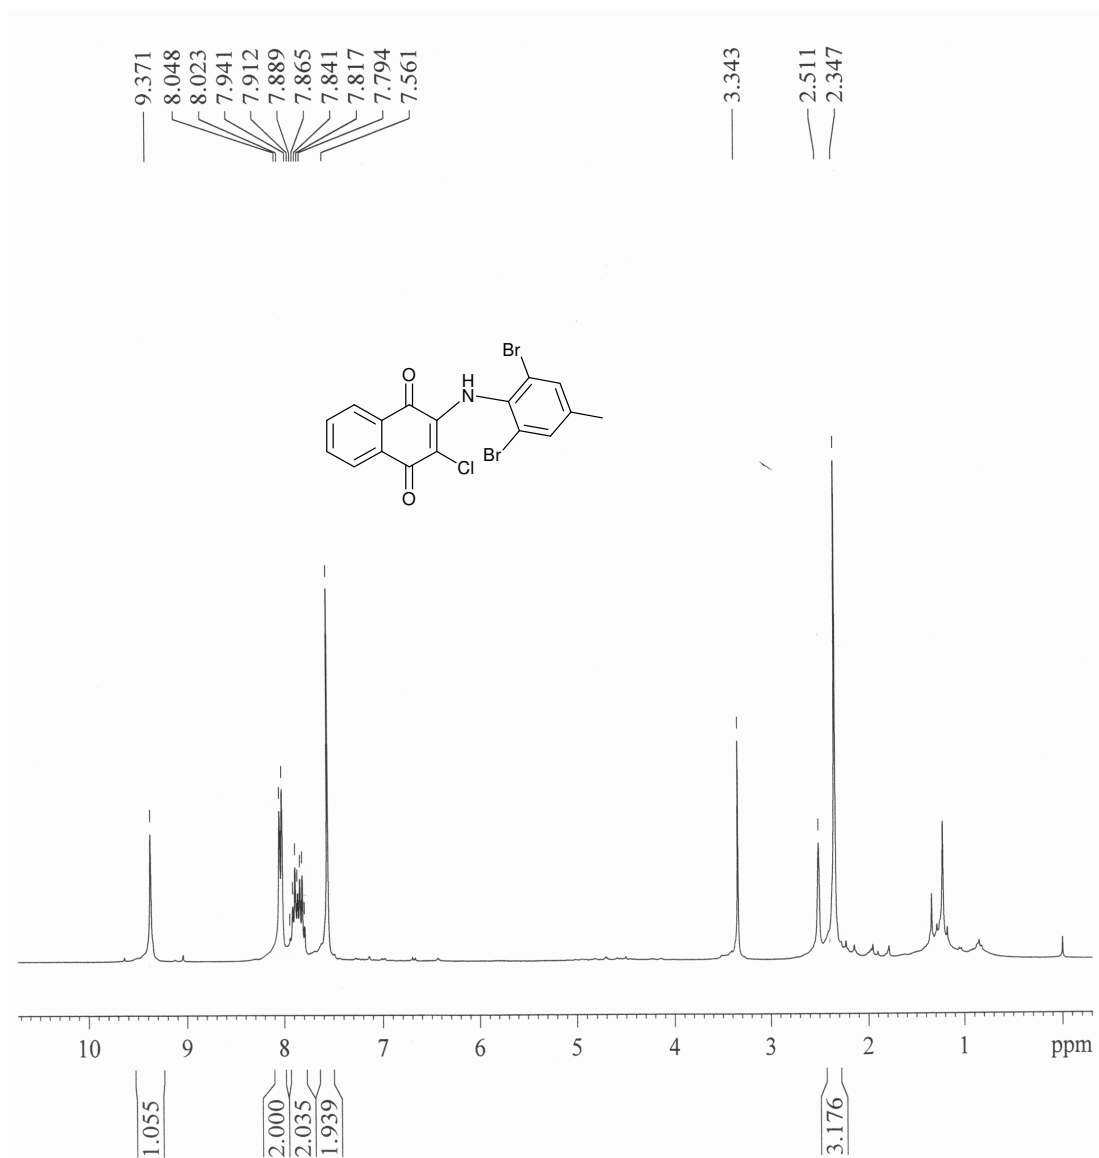

<sup>1</sup>H NMR for **2b**

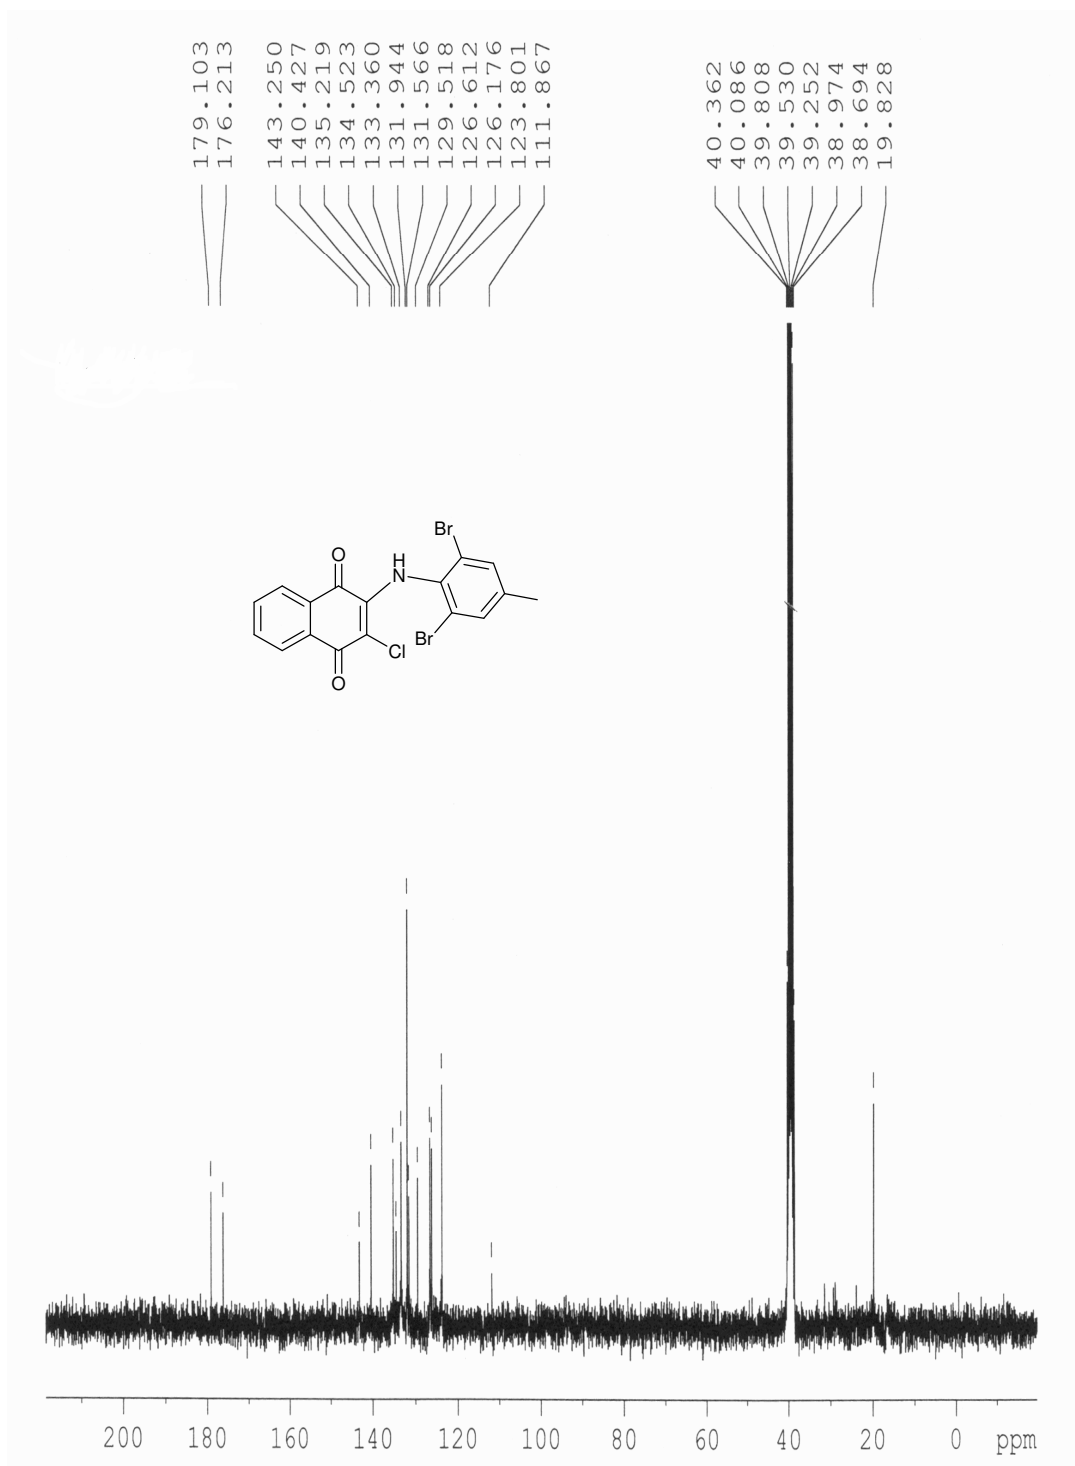

$^{13}\text{C}$  NMR for **2b**

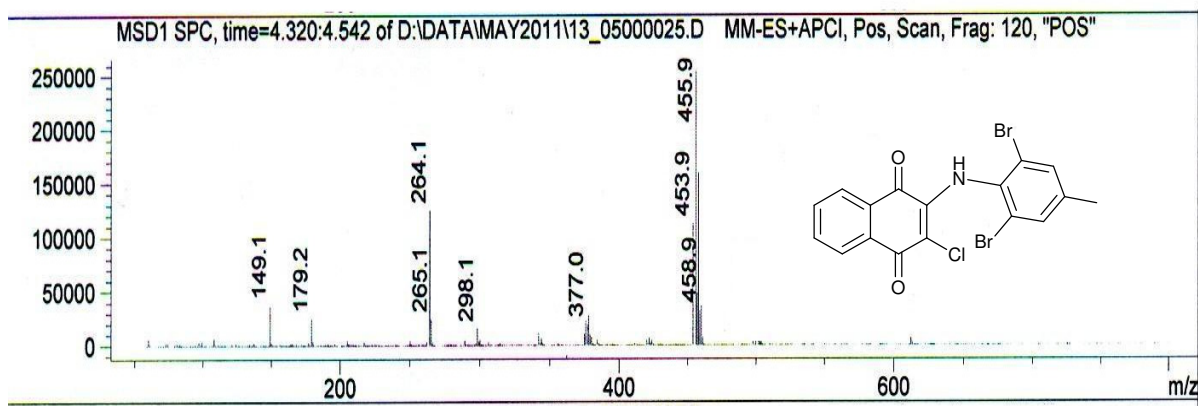

LCMS for **2b**

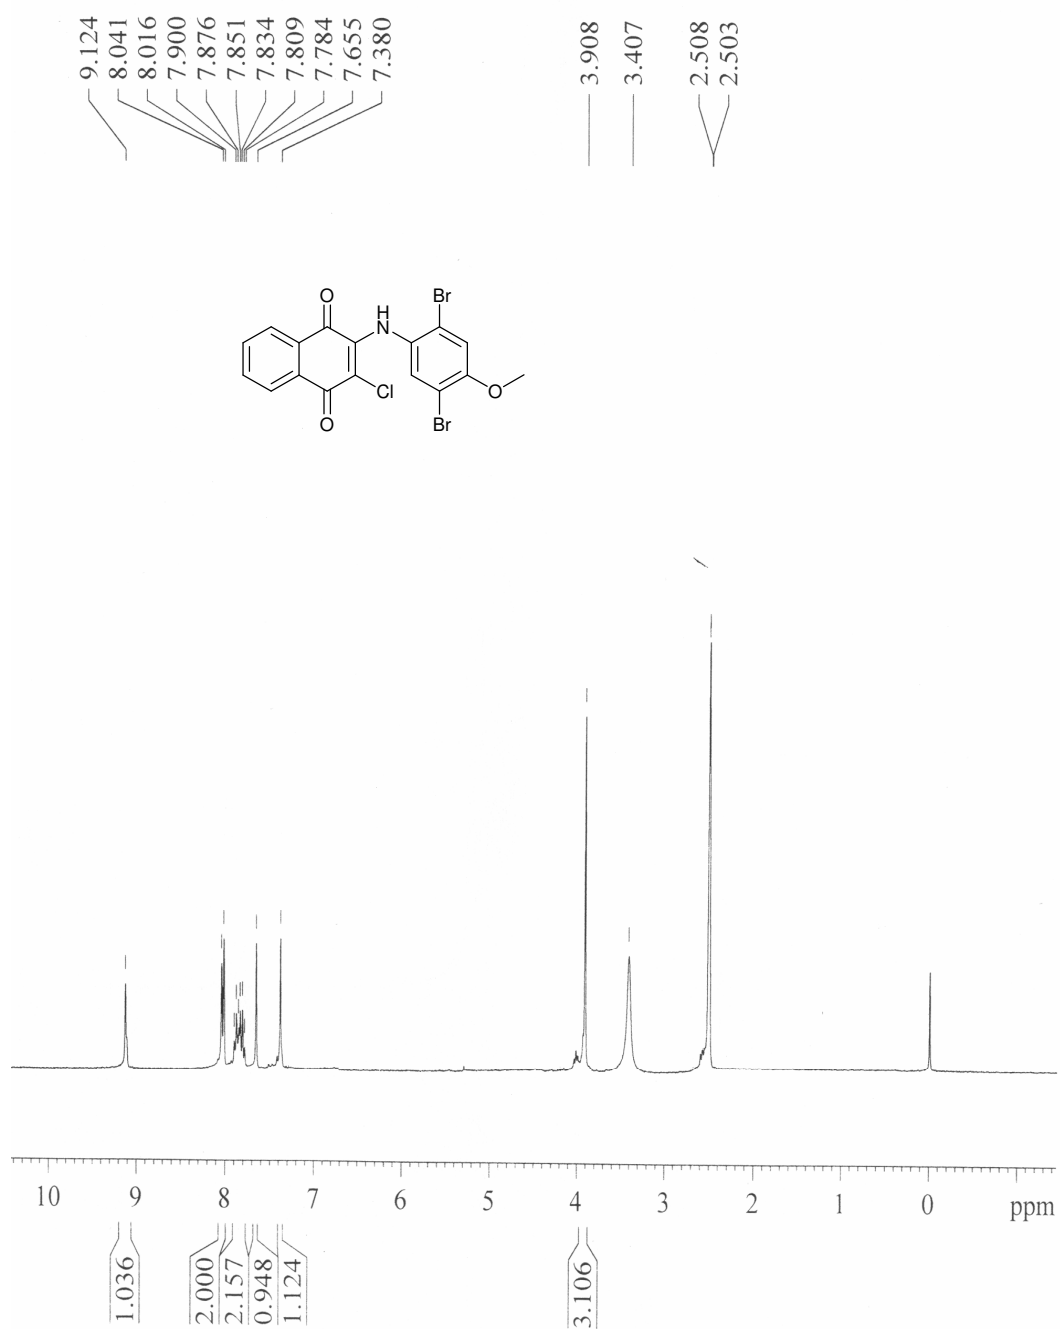

$^1\text{H}$  NMR for **2c**

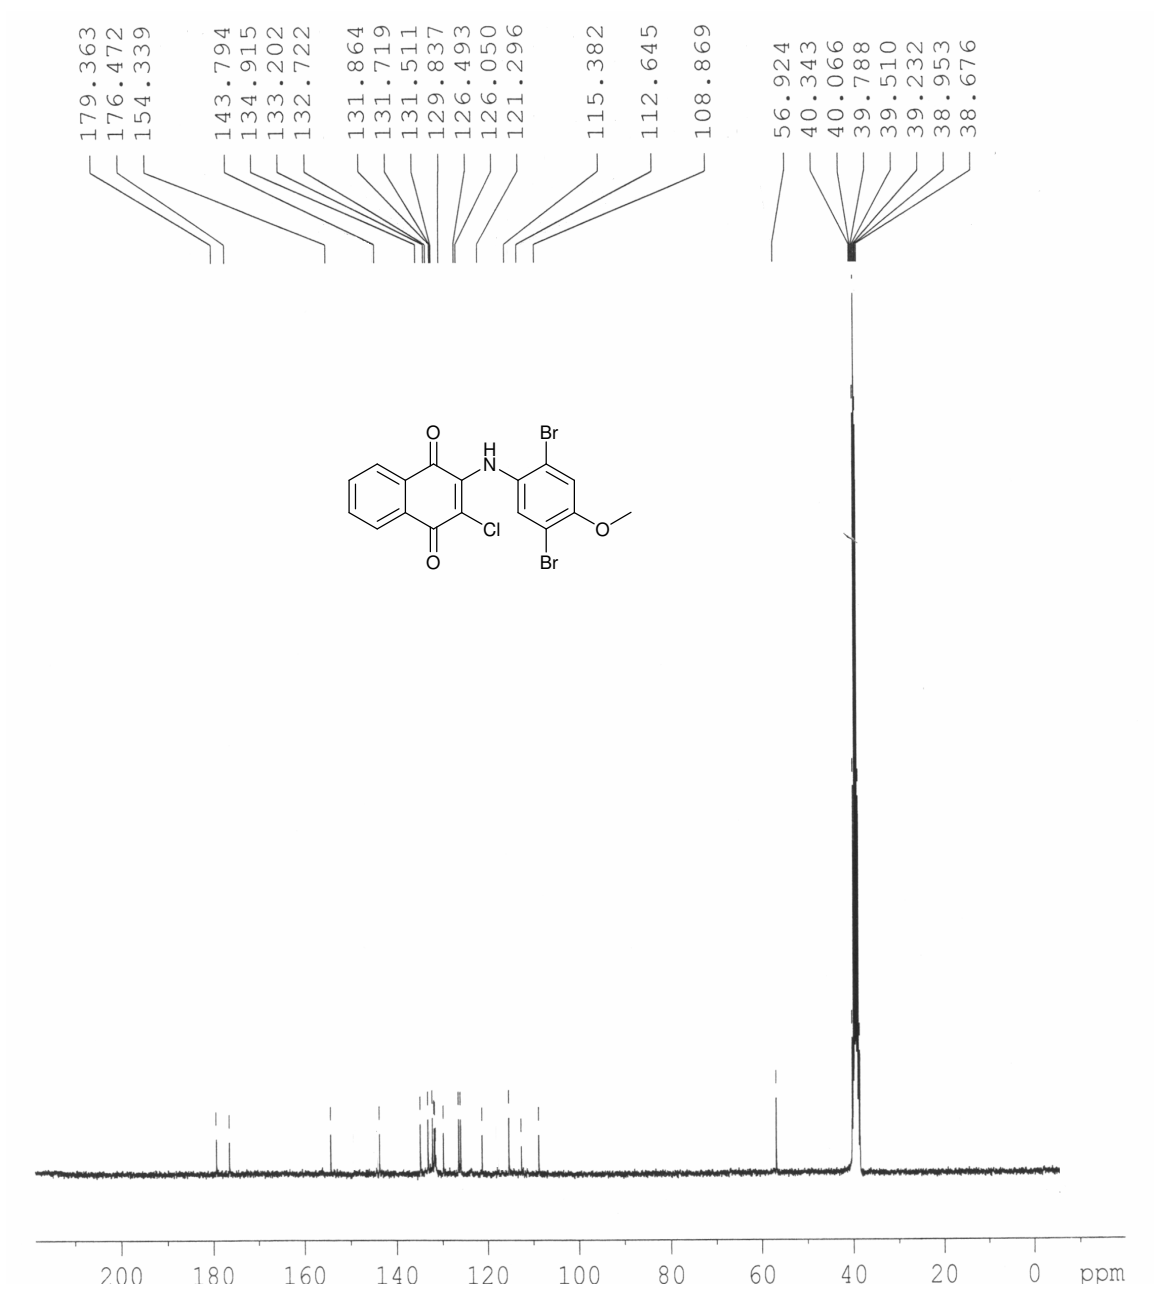

$^{13}\text{C}$  NMR for **2c**



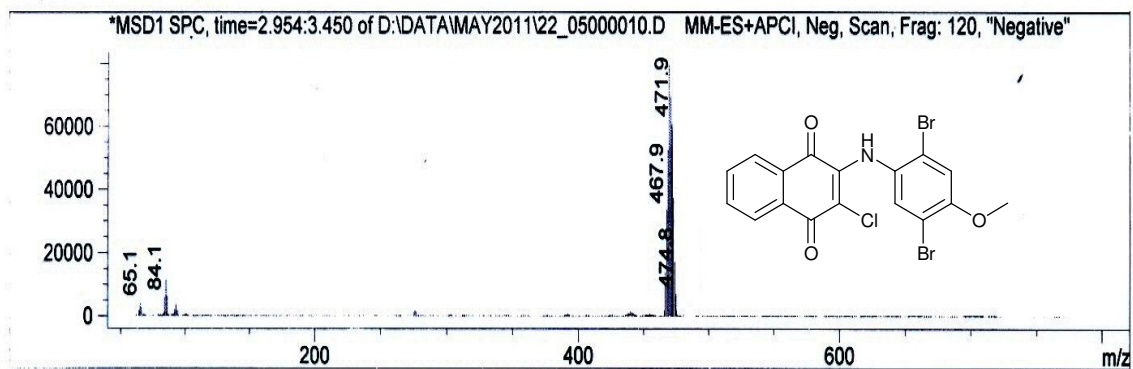

LCMS for 2c

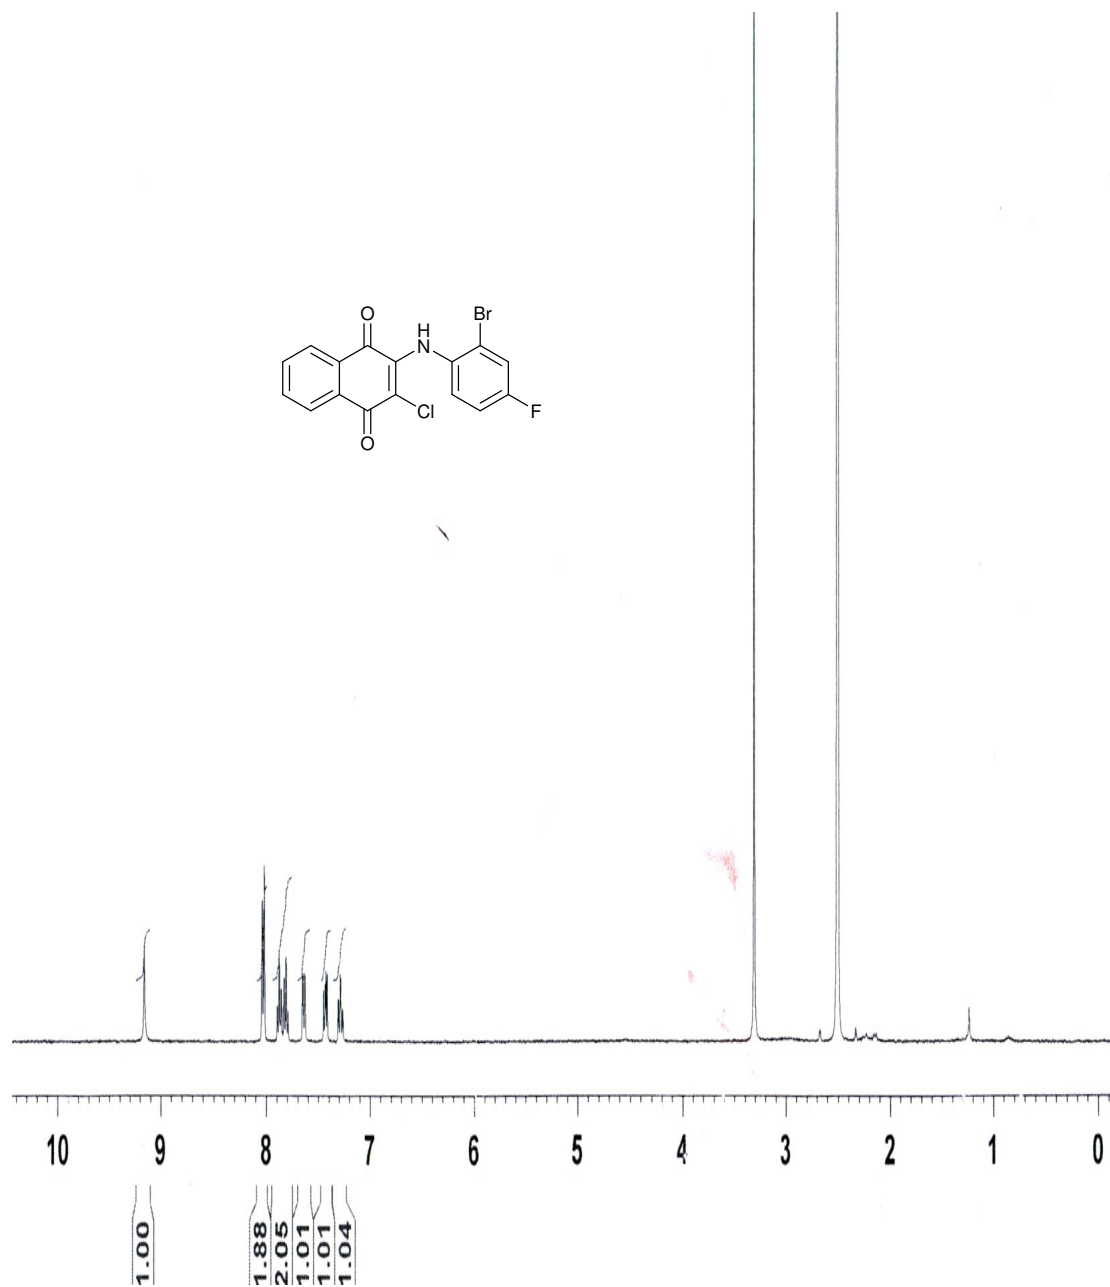

<sup>1</sup>H NMR for 2d

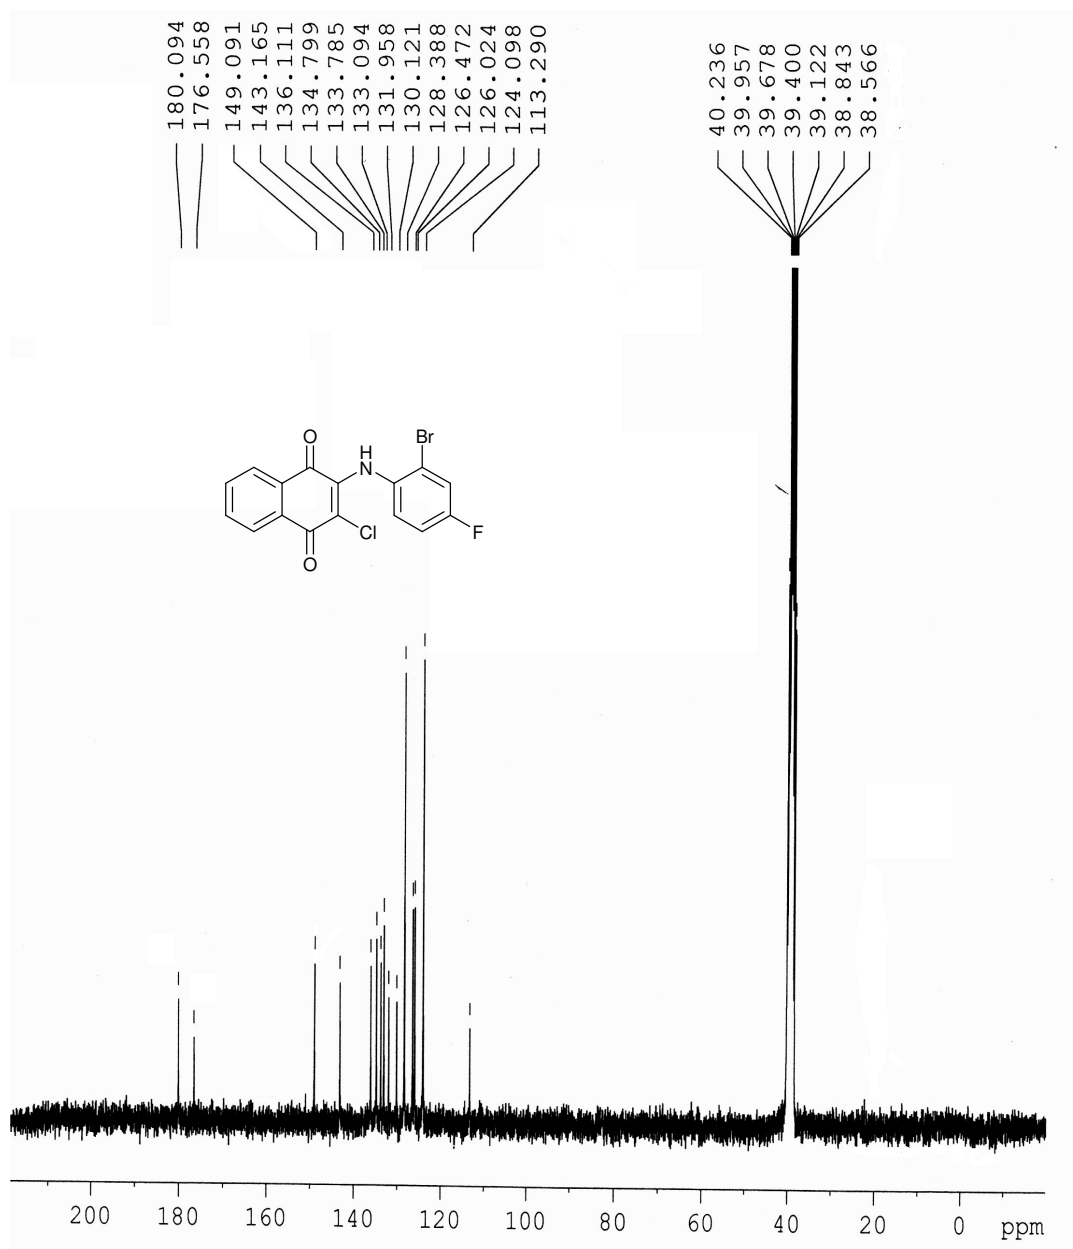

<sup>13</sup>C NMR for **2d**

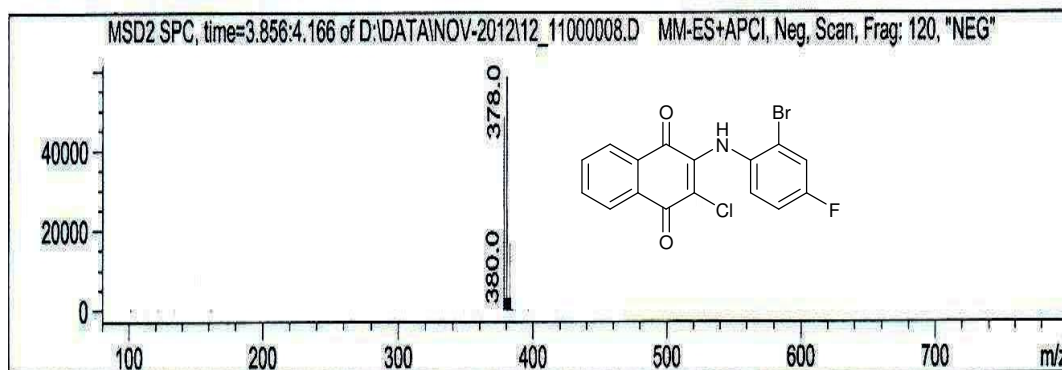

LC- MS for 2d

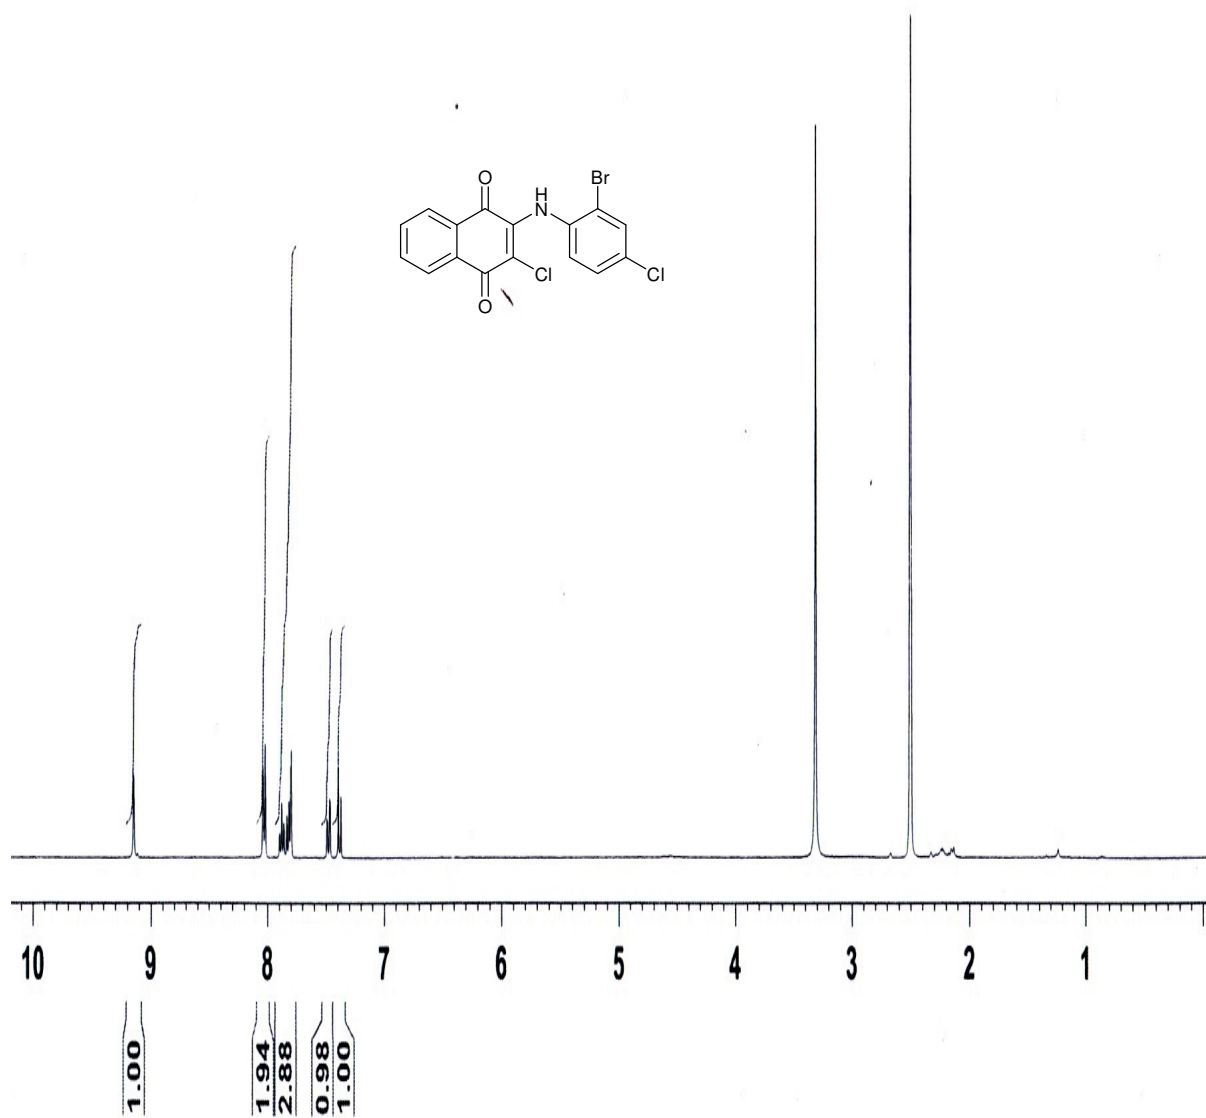

<sup>1</sup>H NMR for 2e

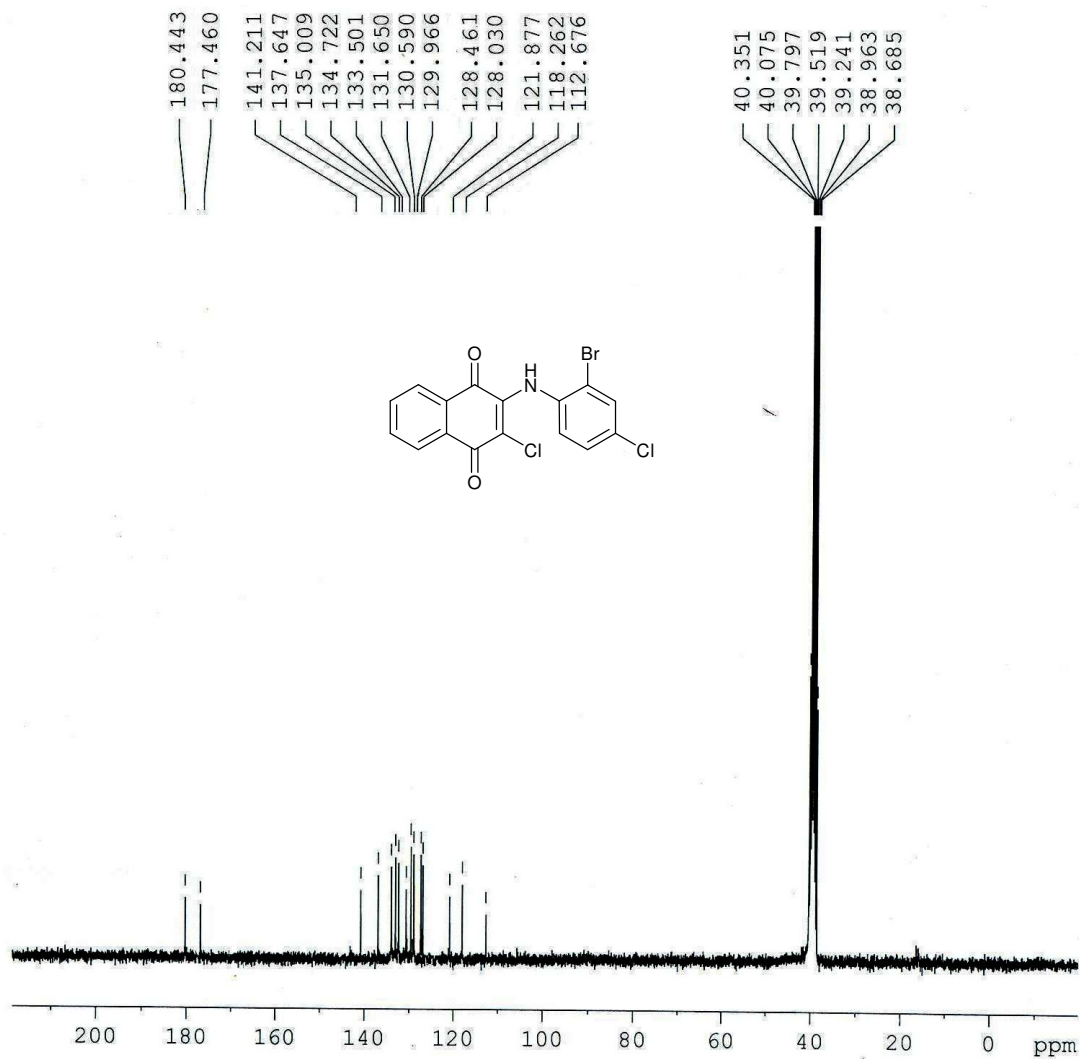

$^{13}\text{C}$  NMR for **2e**

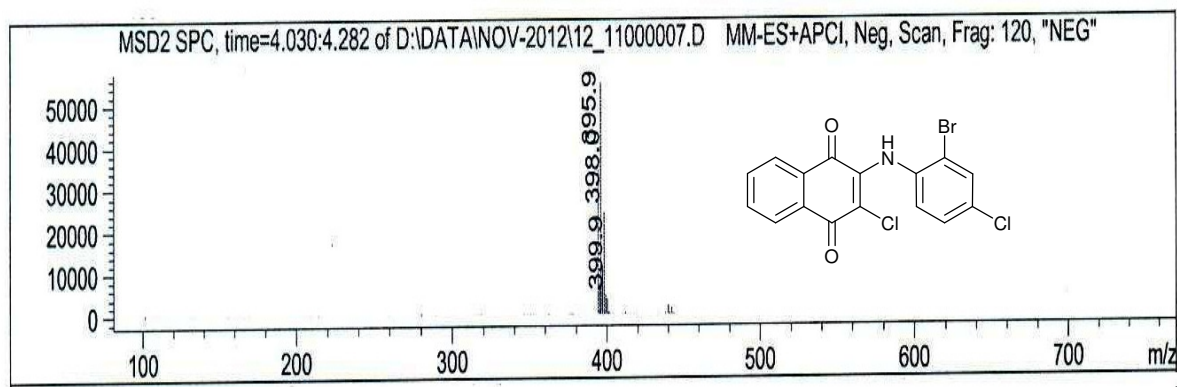

LC- MS for **2e**

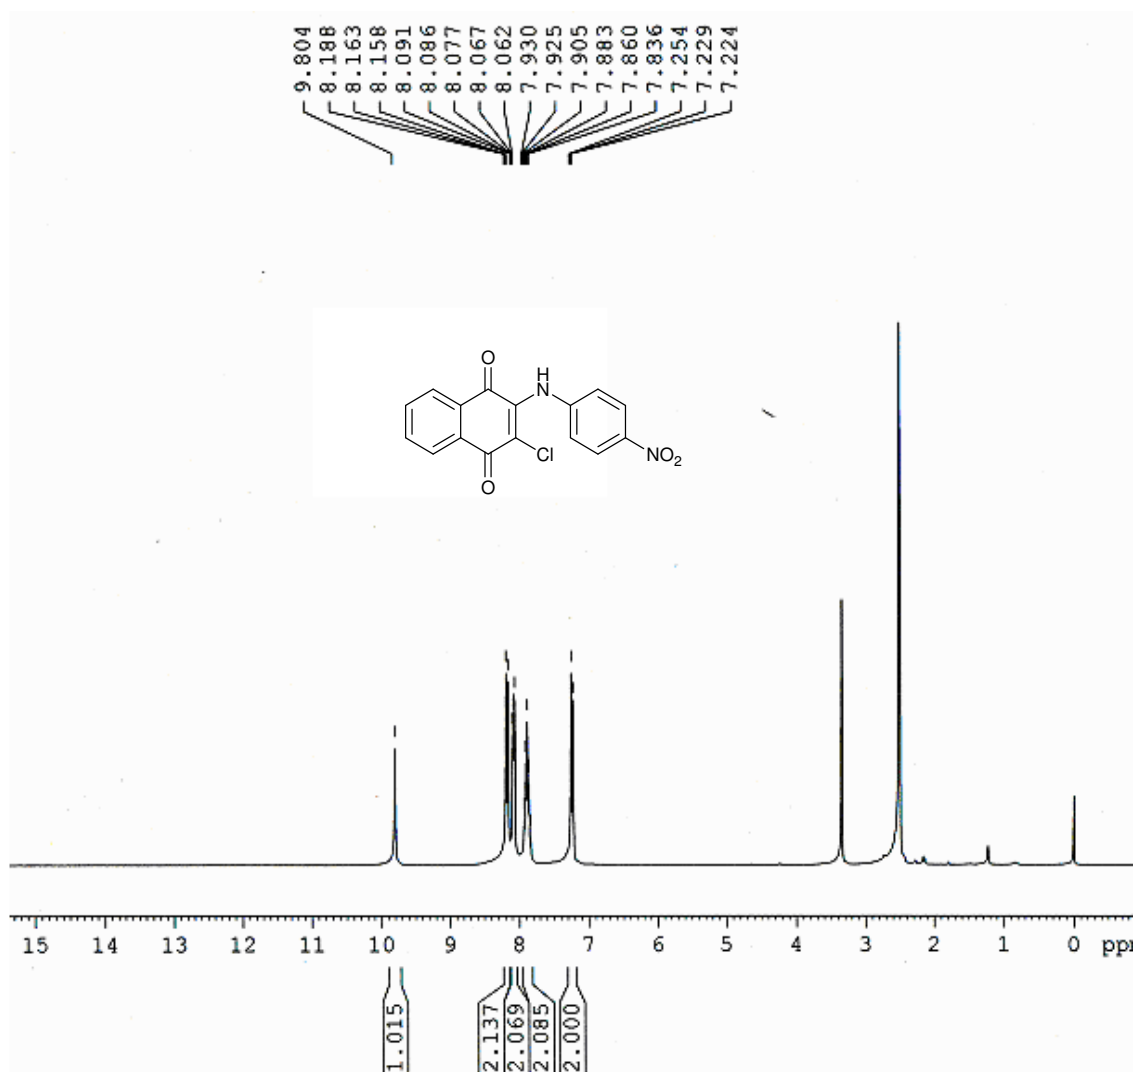

<sup>1</sup>H NMR for **3a**



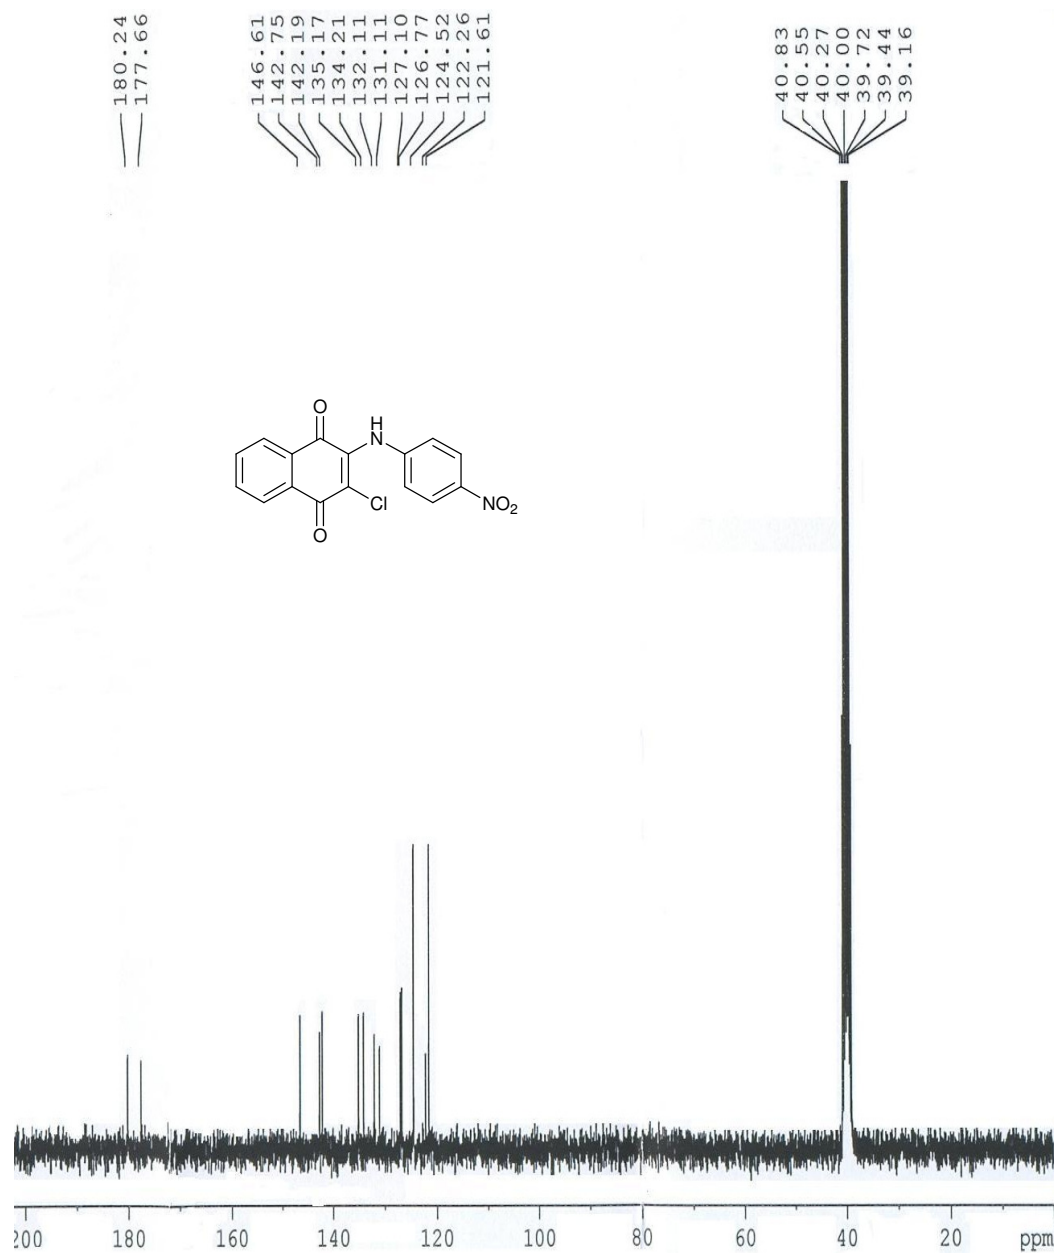

<sup>13</sup>C NMR for **3a**

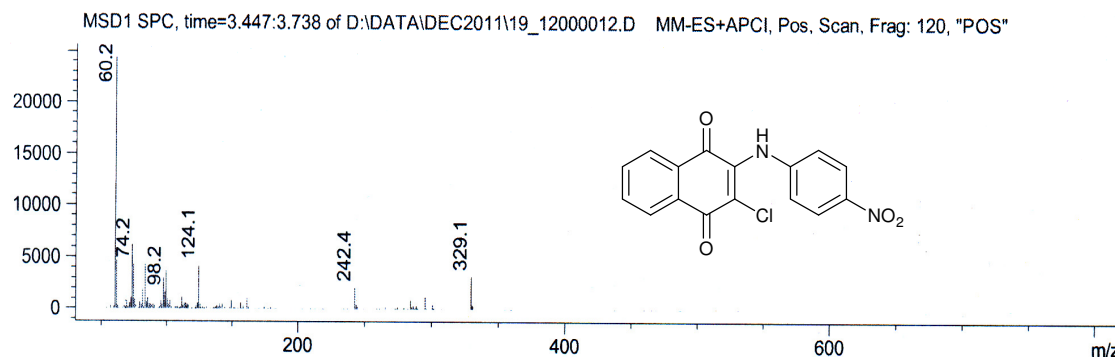

LC-MS for **3a**

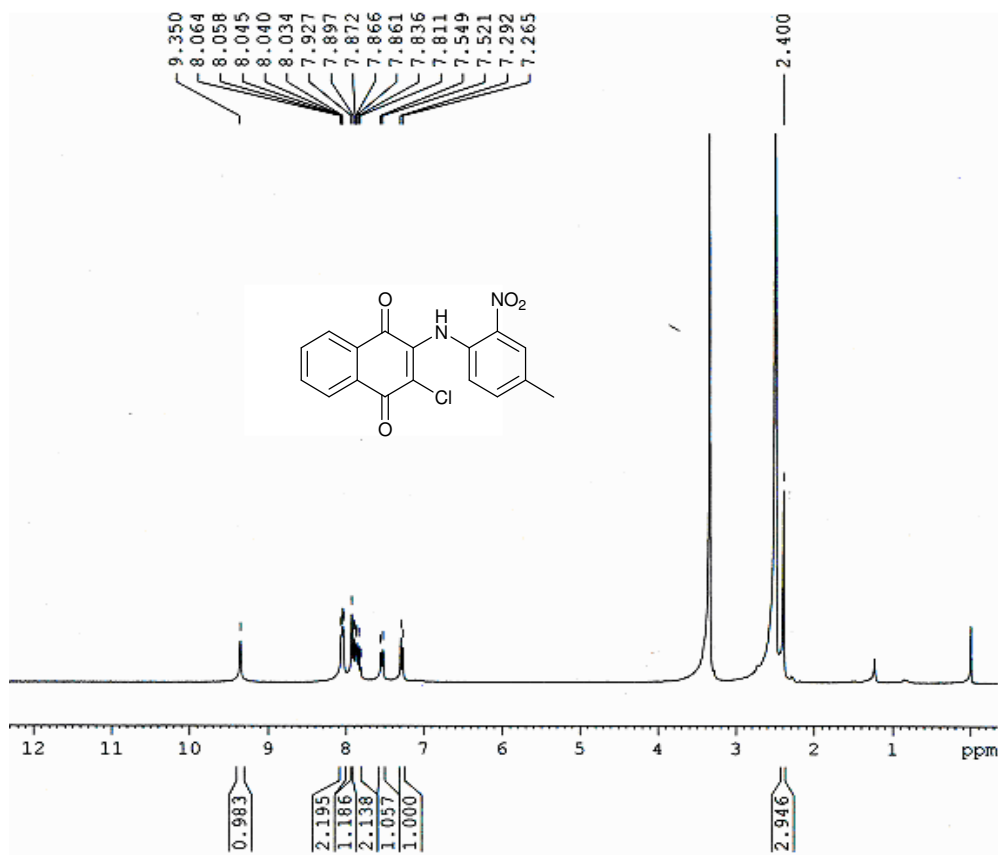

$^1\text{H}$  NMR for **3b**

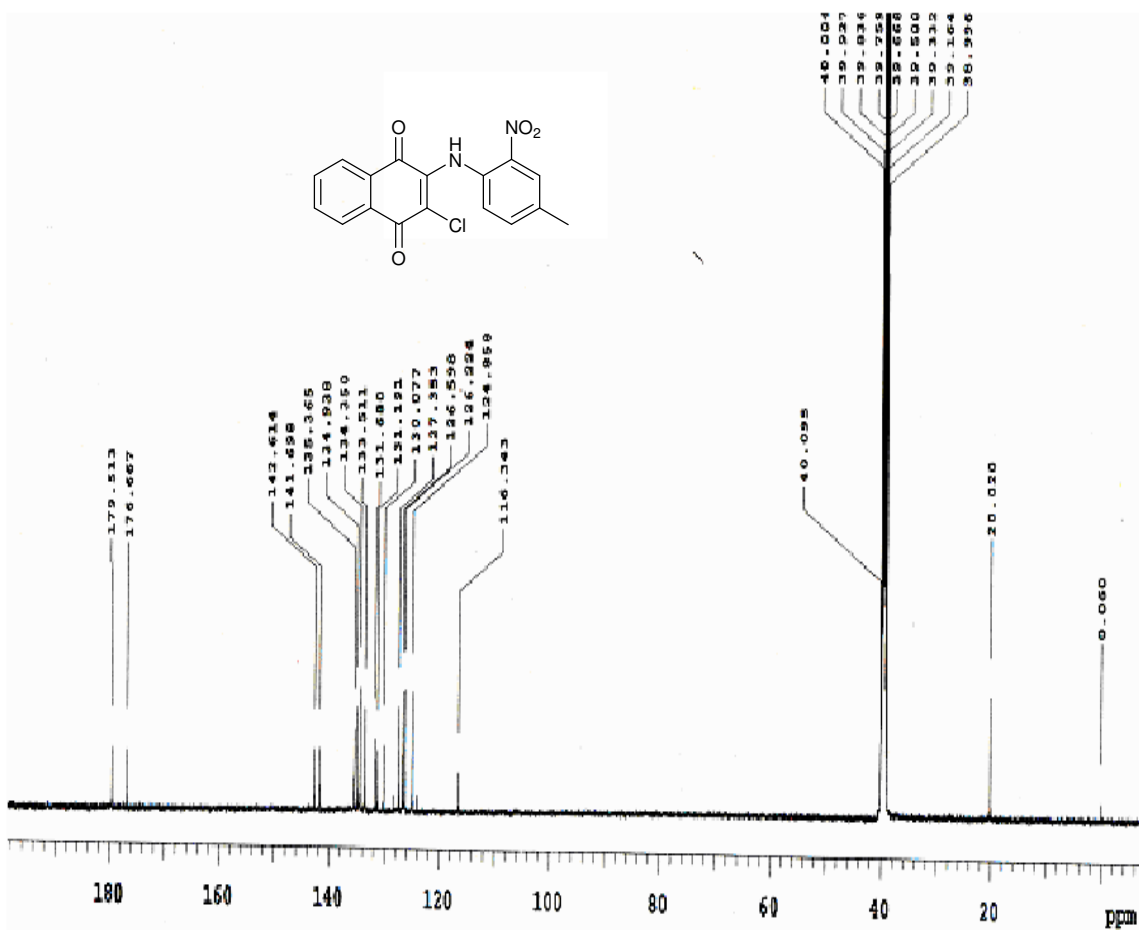

$^{13}\text{C}$  NMR for **3b**

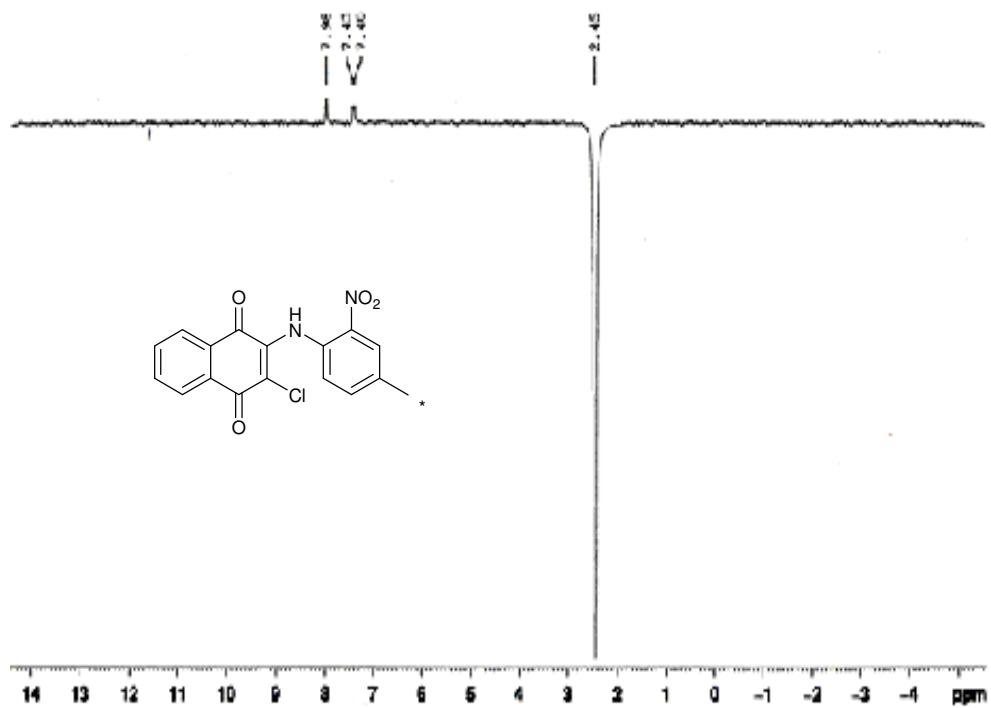

NOSEY for **3b**

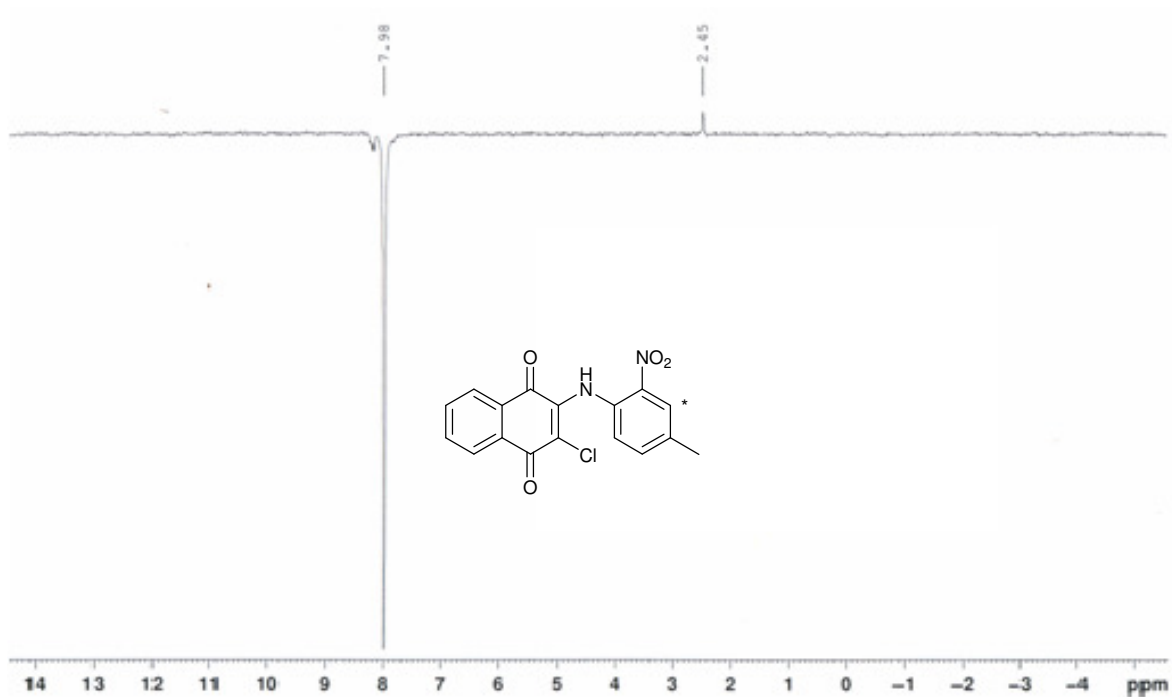

NOSEY for **3b**

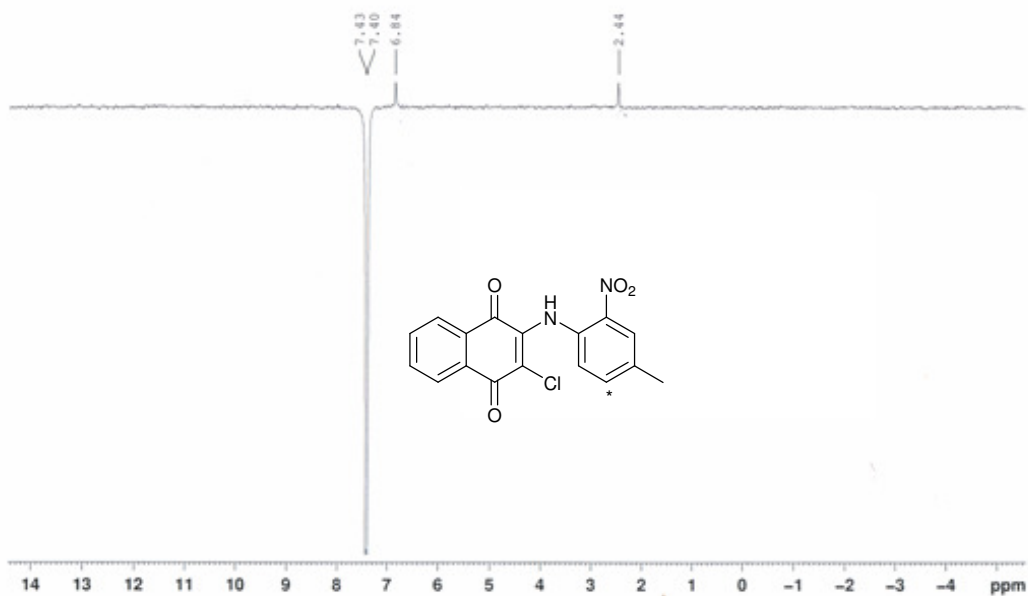

NOSEY for **3b**

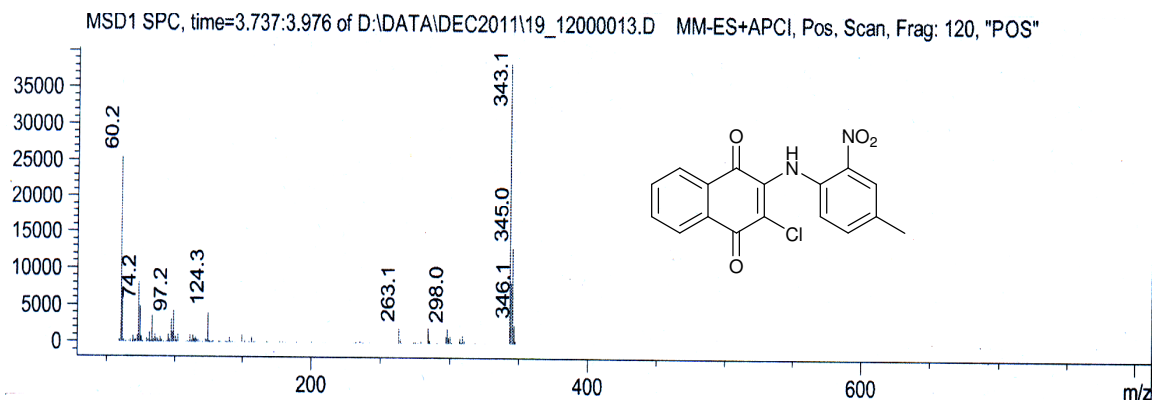

LC-MS for **3b**



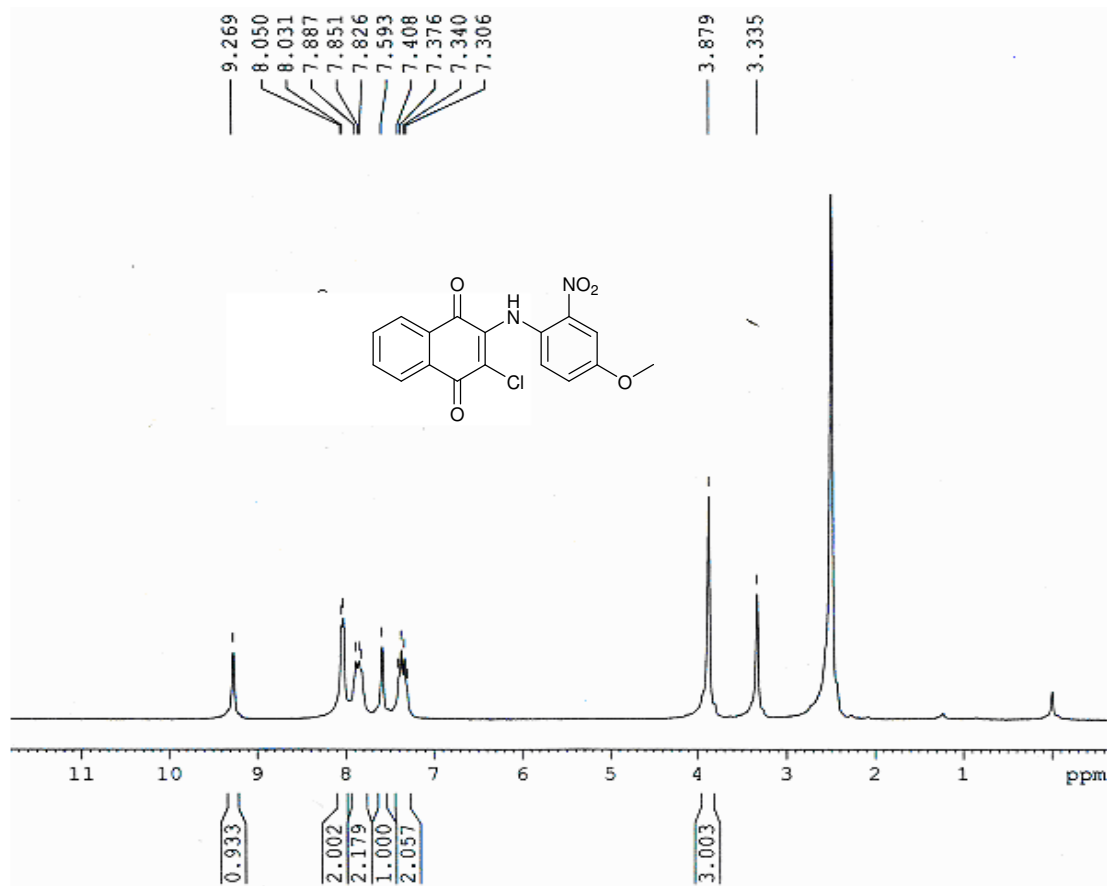

<sup>1</sup>H NMR for **3c**

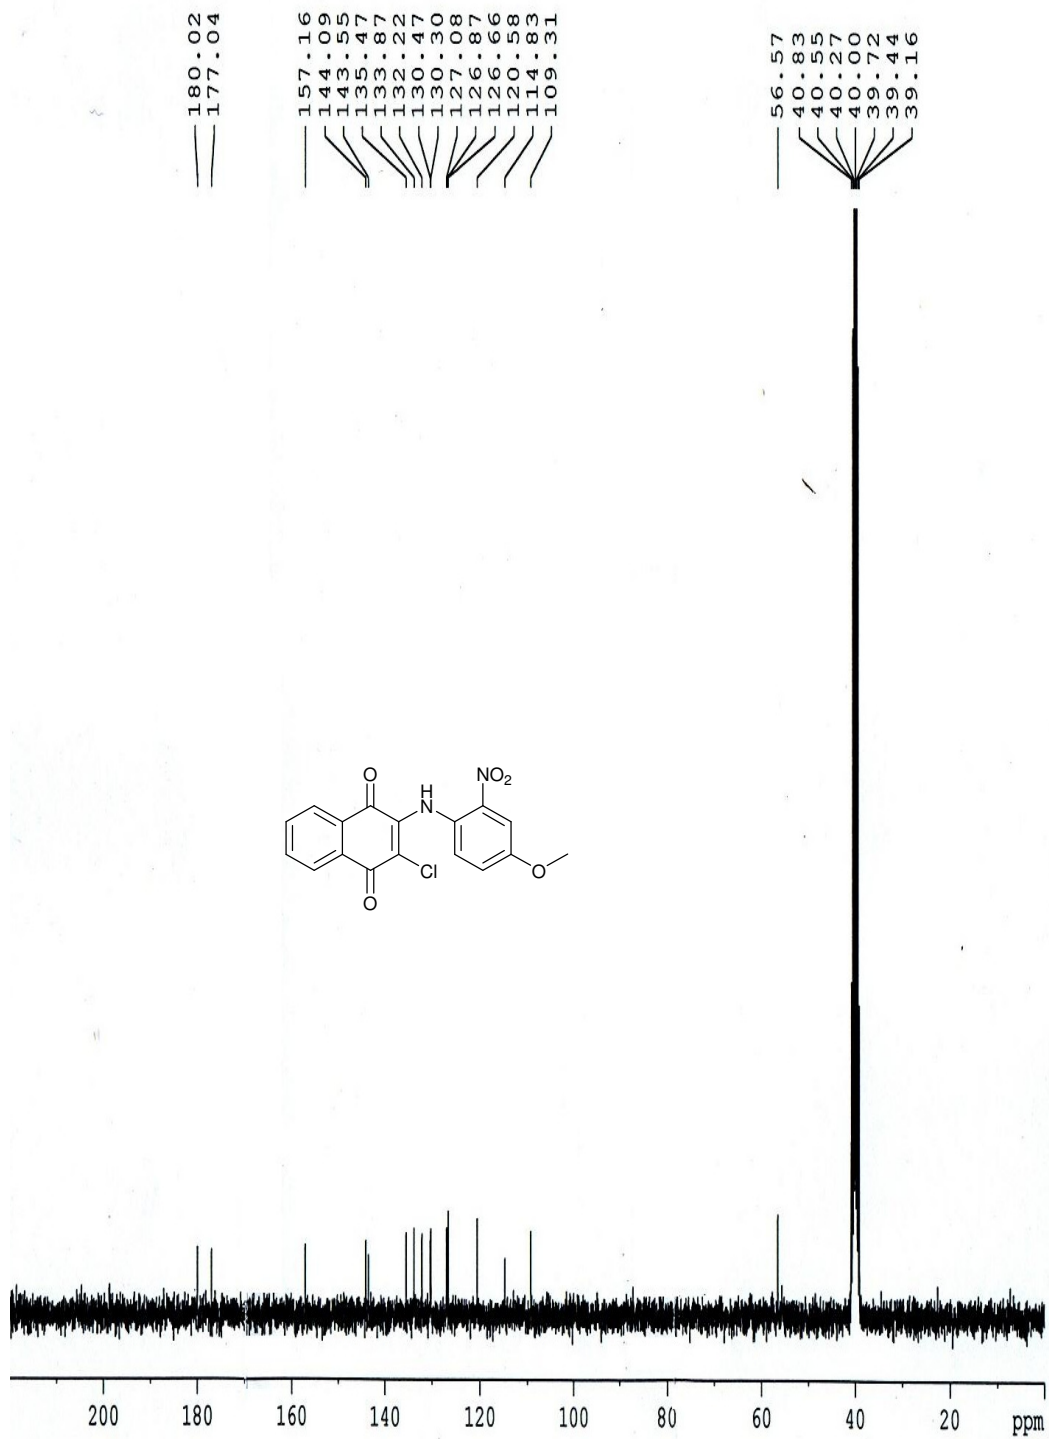

<sup>13</sup>C NMR for 3c

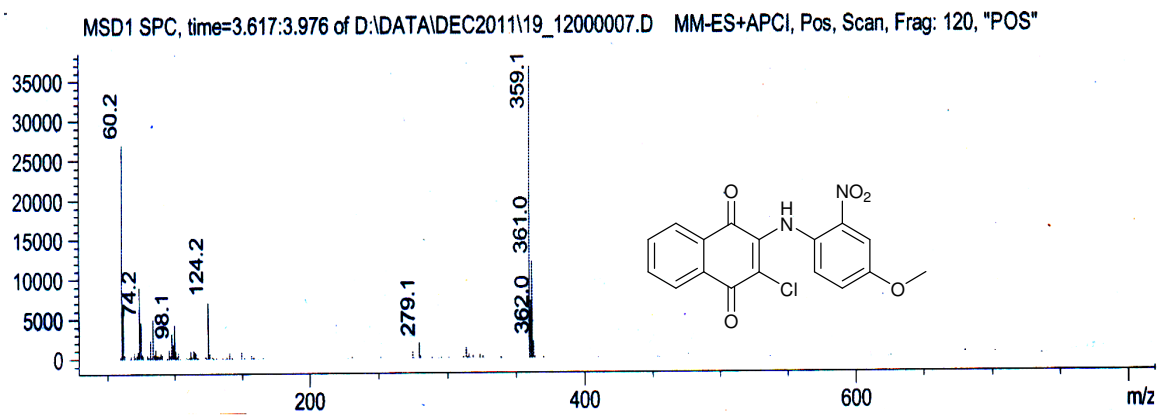

LC-MS for **3c**

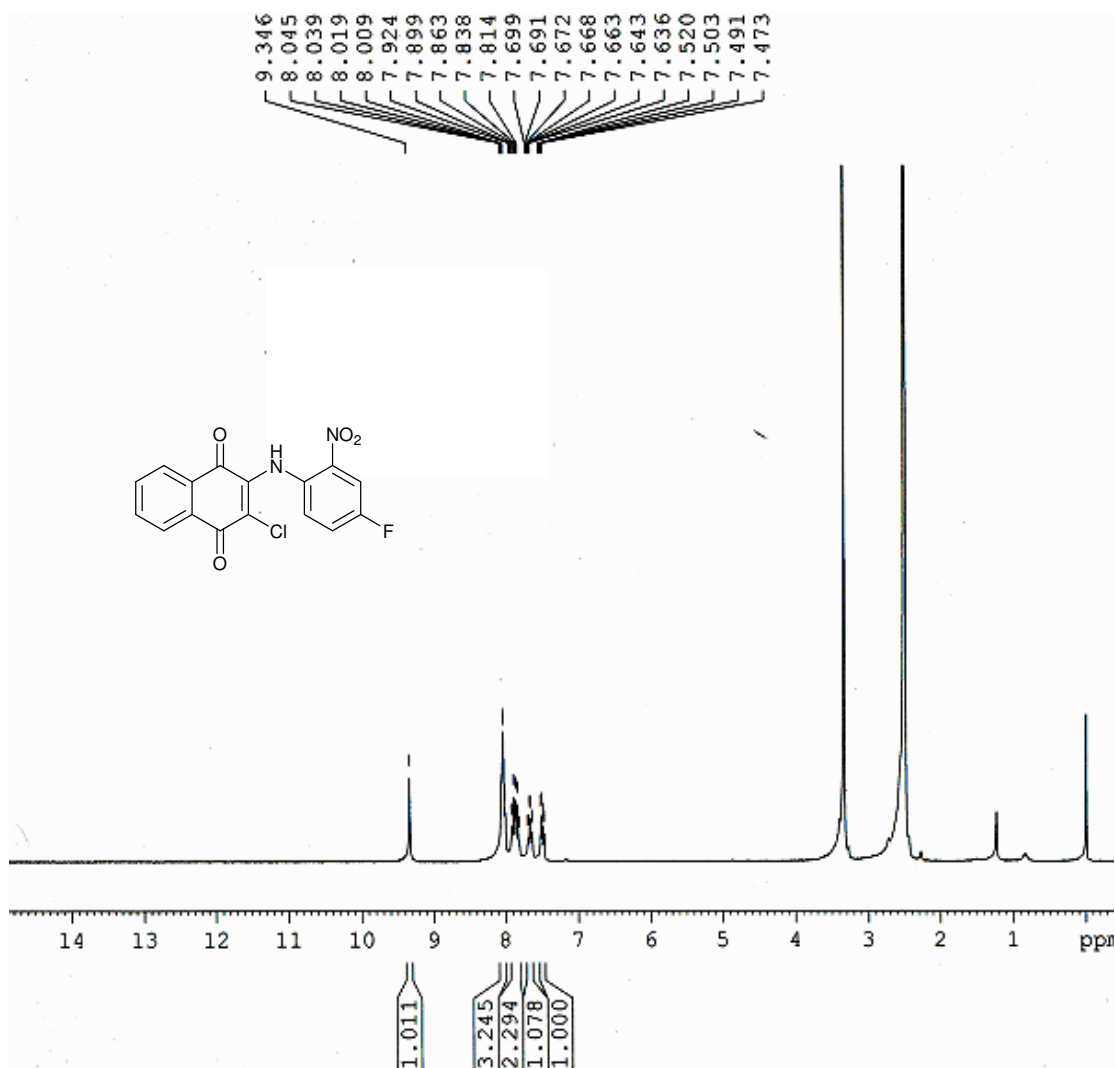

<sup>1</sup>H NMR for **3d**

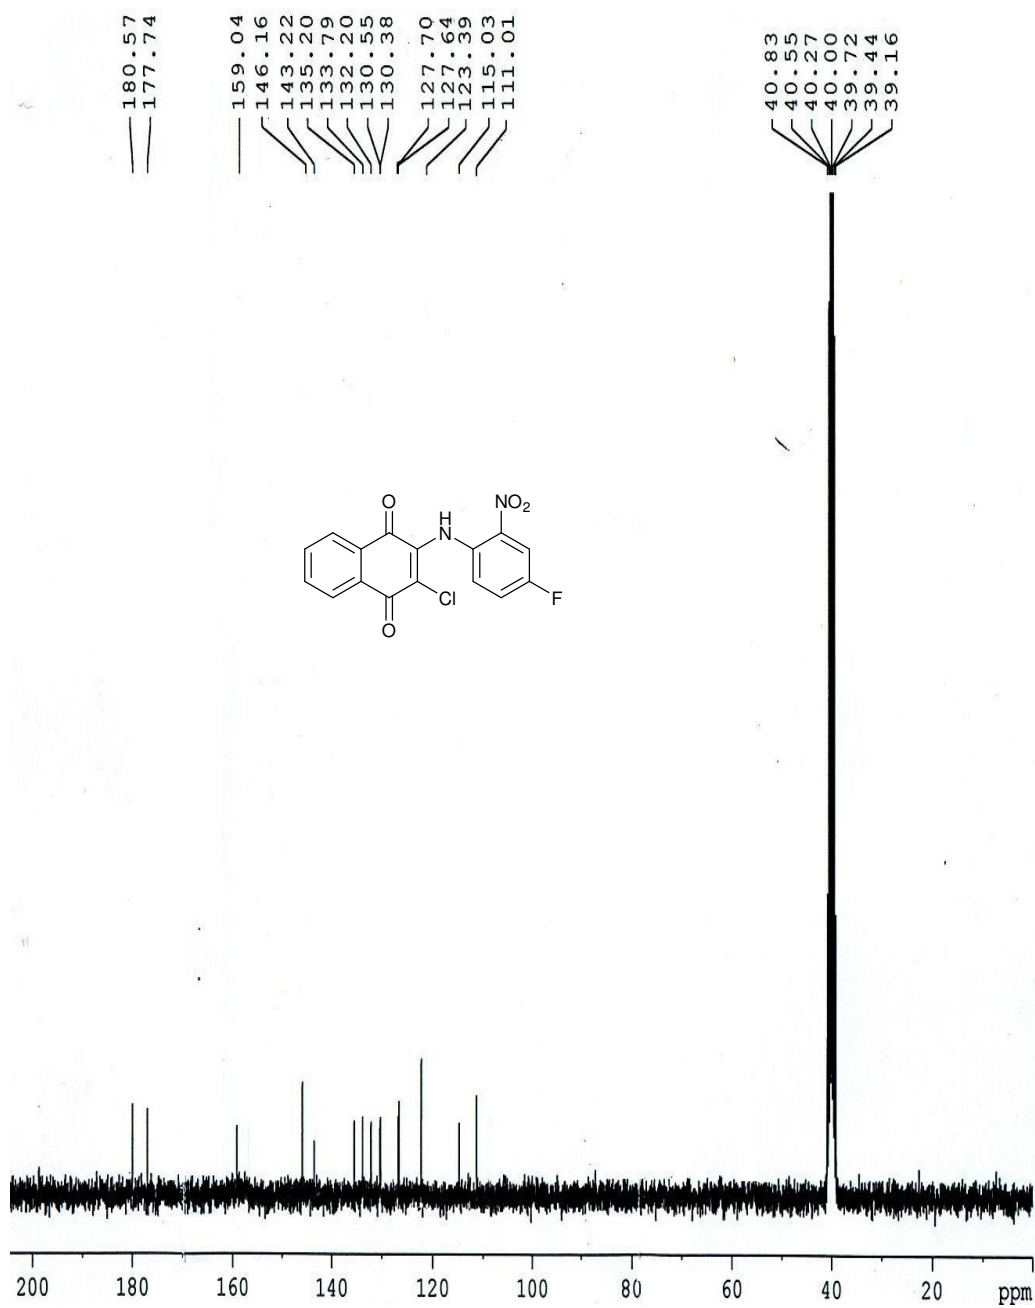

<sup>13</sup>C NMR for **3d**

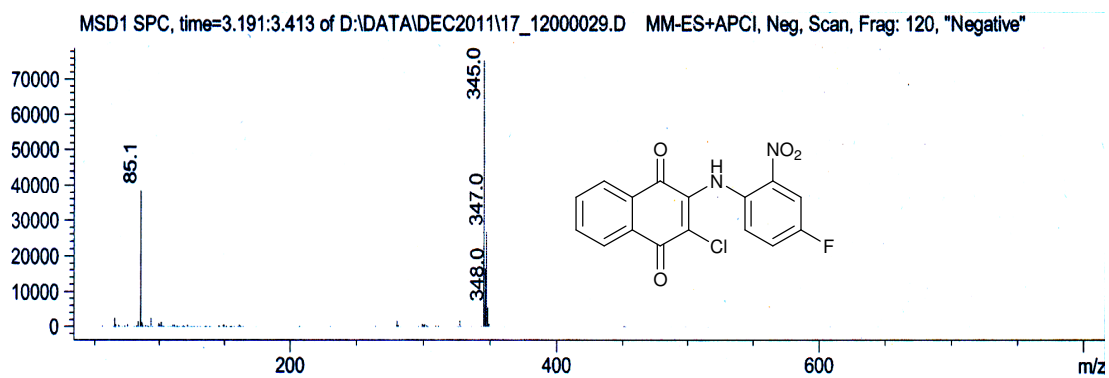

LC- MS for **3d**

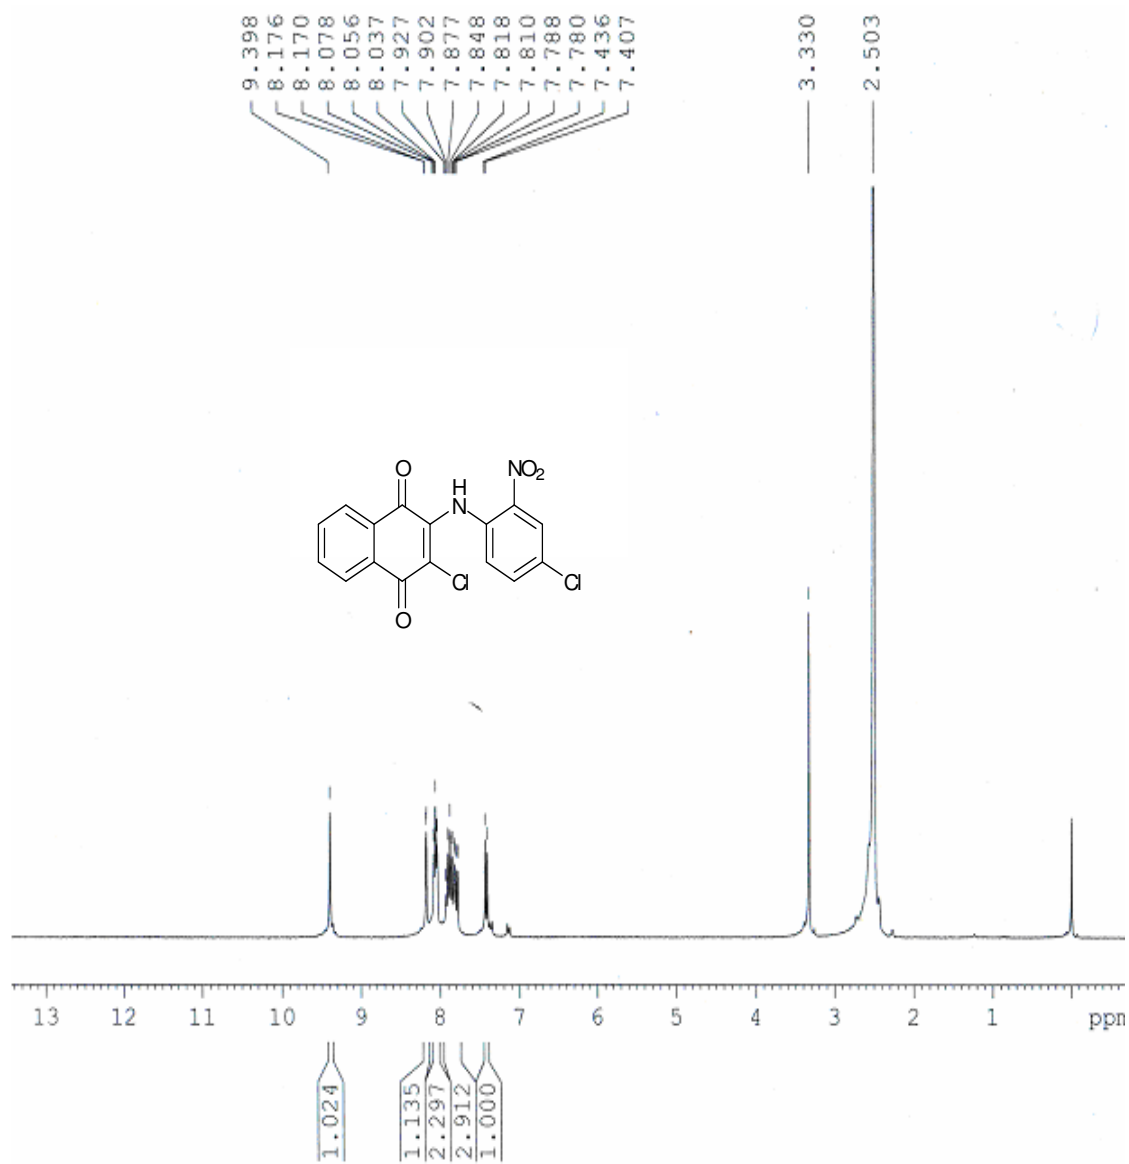

<sup>1</sup>H NMR for **3e**

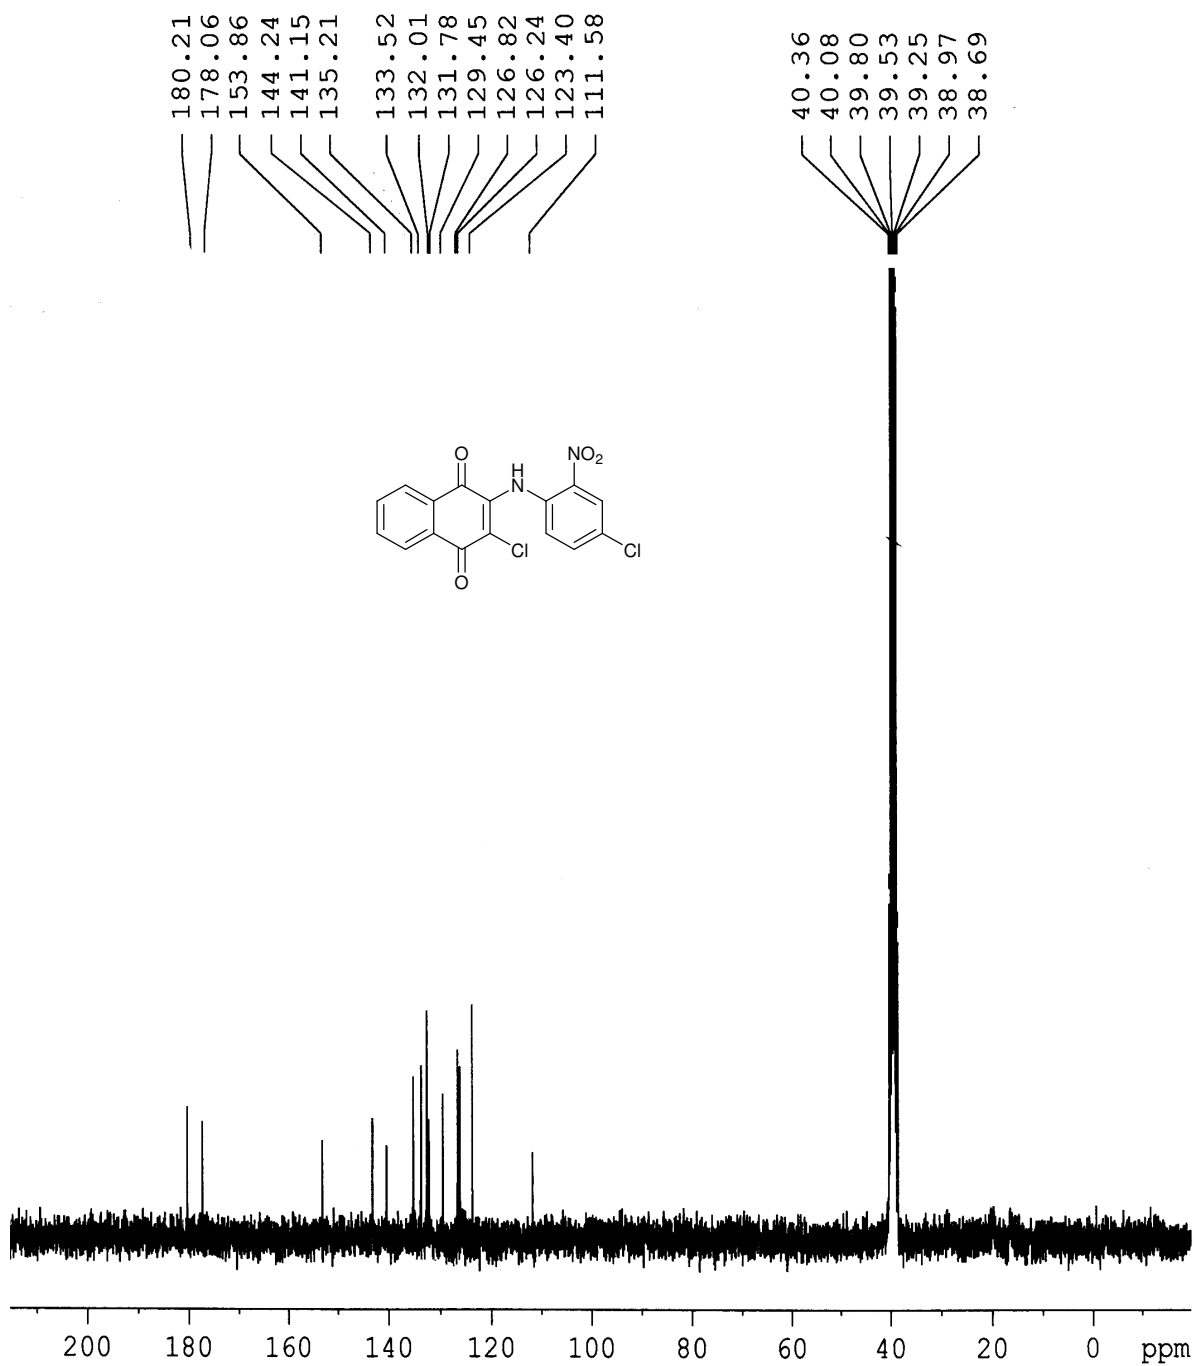

<sup>13</sup>C NMR for **3e**



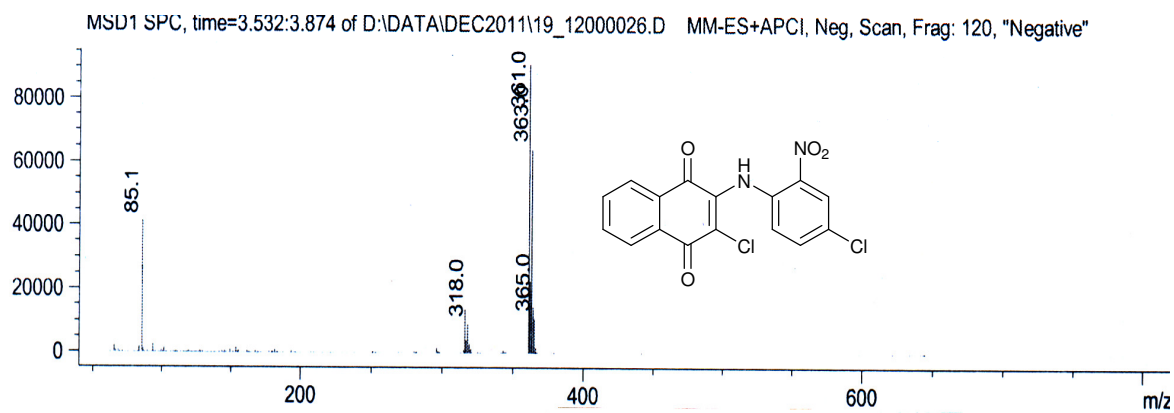

LC-MS for **3e**

**Coordinates for 1a**

|    |              |              |              |
|----|--------------|--------------|--------------|
| C  | -4.546554000 | -2.495627000 | -1.283600000 |
| C  | -3.303671000 | -2.499842000 | -0.647346000 |
| C  | -2.826684000 | -1.328578000 | -0.038678000 |
| C  | -3.601447000 | -0.152425000 | -0.061220000 |
| C  | -4.846220000 | -0.156126000 | -0.698912000 |
| C  | -5.315928000 | -1.323556000 | -1.309904000 |
| H  | -4.914877000 | -3.398997000 | -1.757703000 |
| H  | -2.689166000 | -3.392163000 | -0.614472000 |
| C  | -1.512118000 | -1.324751000 | 0.613013000  |
| C  | -3.127810000 | 1.093878000  | 0.613849000  |
| H  | -5.427912000 | 0.758111000  | -0.698848000 |
| H  | -6.282023000 | -1.321018000 | -1.803709000 |
| C  | -1.817816000 | 1.055673000  | 1.255315000  |
| C  | -0.987777000 | -0.038276000 | 1.210340000  |
| N  | 0.276528000  | -0.206038000 | 1.699724000  |
| H  | 0.544419000  | -1.188869000 | 1.710737000  |
| C  | 1.318467000  | 0.724315000  | 1.965246000  |
| C  | 1.530074000  | 1.856760000  | 1.162409000  |
| C  | 2.217546000  | 0.426141000  | 3.002816000  |
| C  | 2.618518000  | 2.694030000  | 1.419720000  |
| H  | 0.857296000  | 2.073037000  | 0.341703000  |
| C  | 3.309282000  | 1.262657000  | 3.244523000  |
| H  | 2.046967000  | -0.449750000 | 3.621105000  |
| C  | 3.511065000  | 2.403600000  | 2.458279000  |
| H  | 2.772844000  | 3.570406000  | 0.798934000  |
| H  | 3.996271000  | 1.026987000  | 4.050675000  |
| H  | 4.355761000  | 3.056596000  | 2.650332000  |
| Cl | -1.396517000 | 2.540520000  | 2.196400000  |
| O  | -3.858203000 | 2.112074000  | 0.629413000  |
| O  | -0.796428000 | -2.351443000 | 0.693520000  |

**Coordinates for 1b**

|    |              |              |              |
|----|--------------|--------------|--------------|
| C  | -4.414425000 | -2.586942000 | -1.480998000 |
| C  | -3.255811000 | -2.562768000 | -0.702234000 |
| C  | -2.850996000 | -1.366753000 | -0.089303000 |
| C  | -3.614126000 | -0.194002000 | -0.251181000 |
| C  | -4.774452000 | -0.226151000 | -1.031445000 |
| C  | -5.171763000 | -1.418317000 | -1.645953000 |
| H  | -4.726599000 | -3.509571000 | -1.958331000 |
| H  | -2.651943000 | -3.451713000 | -0.560553000 |
| C  | -1.622326000 | -1.333590000 | 0.712051000  |
| C  | -3.220594000 | 1.079808000  | 0.424542000  |
| H  | -5.349334000 | 0.686260000  | -1.137383000 |
| H  | -6.072437000 | -1.437699000 | -2.250646000 |
| C  | -1.996565000 | 1.070335000  | 1.216862000  |
| C  | -1.169125000 | -0.022906000 | 1.315096000  |
| N  | 0.028756000  | -0.167831000 | 1.953941000  |
| H  | 0.293405000  | -1.148604000 | 2.030950000  |
| C  | 1.030955000  | 0.776045000  | 2.310264000  |
| C  | 1.343933000  | 1.879160000  | 1.500848000  |
| C  | 1.801851000  | 0.522549000  | 3.455629000  |
| C  | 2.394393000  | 2.725946000  | 1.857190000  |
| H  | 0.779715000  | 2.065419000  | 0.595239000  |
| C  | 2.857025000  | 1.370870000  | 3.793394000  |
| H  | 1.564306000  | -0.332184000 | 4.081594000  |
| C  | 3.167673000  | 2.493987000  | 3.007715000  |
| H  | 2.624082000  | 3.577021000  | 1.222888000  |
| H  | 3.443530000  | 1.161435000  | 4.683136000  |
| Cl | -1.686066000 | 2.593556000  | 2.140685000  |
| O  | -3.946230000 | 2.095768000  | 0.312023000  |
| O  | -0.923138000 | -2.354623000 | 0.916115000  |

|                          |              |              |              |                           |              |              |              |
|--------------------------|--------------|--------------|--------------|---------------------------|--------------|--------------|--------------|
| C                        | 4.285380000  | 3.435010000  | 3.397257000  | Cl                        | -1.340743000 | 2.644039000  | 1.954456000  |
| H                        | 5.059905000  | 2.920209000  | 3.975471000  | O                         | -3.498343000 | 2.264150000  | -0.020387000 |
| H                        | 4.760570000  | 3.879146000  | 2.515916000  | O                         | -1.161306000 | -2.458713000 | 1.227448000  |
| H                        | 3.911748000  | 4.262323000  | 4.016189000  | O                         | 4.411701000  | 2.709660000  | 3.808040000  |
| <b>Coordinate for 1c</b> |              |              |              | C                         | 4.998822000  | 3.752292000  | 2.984981000  |
| C                        | -4.460507000 | -2.471692000 | -1.437005000 | H                         | 5.823815000  | 4.149593000  | 3.574722000  |
| C                        | -3.372730000 | -2.521152000 | -0.563230000 | H                         | 5.380935000  | 3.345906000  | 2.041085000  |
| C                        | -2.857501000 | -1.333317000 | -0.021130000 | H                         | 4.274479000  | 4.548439000  | 2.777006000  |
| C                        | -3.439215000 | -0.093458000 | -0.350174000 | <b>Coordinates for 1d</b> |              |              |              |
| C                        | -4.529470000 | -0.051833000 | -1.225308000 | C                         | -4.547094000 | -2.496001000 | -1.289963000 |
| C                        | -5.036857000 | -1.236903000 | -1.768258000 | C                         | -3.302035000 | -2.499982000 | -0.657945000 |
| H                        | -4.857825000 | -3.388433000 | -1.859238000 | C                         | -2.825333000 | -1.329829000 | -0.046828000 |
| H                        | -2.908118000 | -3.462358000 | -0.292629000 | C                         | -3.602488000 | -0.154932000 | -0.063075000 |
| C                        | -1.700842000 | -1.380920000 | 0.880158000  | C                         | -4.849249000 | -0.158884000 | -0.696791000 |
| C                        | -2.928991000 | 1.179033000  | 0.245750000  | C                         | -5.318755000 | -1.325358000 | -1.309909000 |
| H                        | -4.964733000 | 0.912360000  | -1.459985000 | H                         | -4.915334000 | -3.398524000 | -1.765646000 |
| H                        | -5.882662000 | -1.198886000 | -2.446828000 | H                         | -2.685877000 | -3.391327000 | -0.630243000 |
| C                        | -1.784670000 | 1.088874000  | 1.143024000  | C                         | -1.508992000 | -1.325730000 | 0.600202000  |
| C                        | -1.124761000 | -0.087442000 | 1.411642000  | C                         | -3.128637000 | 1.090168000  | 0.613254000  |
| N                        | -0.012421000 | -0.324009000 | 2.165901000  | H                         | -5.432825000 | 0.754142000  | -0.692367000 |
| H                        | 0.115739000  | -1.320217000 | 2.337222000  | H                         | -6.286434000 | -1.323050000 | -1.800511000 |
| C                        | 1.067002000  | 0.519702000  | 2.549176000  | C                         | -1.816291000 | 1.051957000  | 1.252094000  |
| C                        | 1.607517000  | 1.482114000  | 1.686730000  | C                         | -0.986674000 | -0.041074000 | 1.203817000  |
| C                        | 1.671705000  | 0.299950000  | 3.800960000  | N                         | 0.278886000  | -0.210944000 | 1.691667000  |
| C                        | 2.717733000  | 2.238375000  | 2.075036000  | H                         | 0.549702000  | -1.193190000 | 1.688507000  |
| H                        | 1.169651000  | 1.640464000  | 0.708834000  | C                         | 1.313769000  | 0.721806000  | 1.970981000  |
| C                        | 2.783686000  | 1.039543000  | 4.186240000  | C                         | 1.533584000  | 1.854289000  | 1.168405000  |
| H                        | 1.254484000  | -0.443357000 | 4.472751000  | C                         | 2.198333000  | 0.430825000  | 3.023677000  |
| C                        | 3.307170000  | 2.018664000  | 3.326828000  | C                         | 2.611028000  | 2.701382000  | 1.433968000  |
| H                        | 3.111770000  | 2.981196000  | 1.393004000  | H                         | 0.872894000  | 2.067807000  | 0.337945000  |
| H                        | 3.257524000  | 0.886128000  | 5.148205000  | C                         | 3.285498000  | 1.266585000  | 3.284646000  |

|    |              |              |             |
|----|--------------|--------------|-------------|
| H  | 2.023336000  | -0.442215000 | 3.643394000 |
| C  | 3.465901000  | 2.391320000  | 2.486397000 |
| H  | 2.794009000  | 3.581808000  | 0.830940000 |
| H  | 3.974878000  | 1.060178000  | 4.093611000 |
| Cl | -1.393100000 | 2.537483000  | 2.191793000 |
| O  | -3.858102000 | 2.108410000  | 0.632538000 |
| O  | -0.788788000 | -2.349826000 | 0.673193000 |
| F  | 4.543499000  | 3.232131000  | 2.745998000 |

**Coordinates for 1e**

|   |              |              |              |
|---|--------------|--------------|--------------|
| C | -4.521262000 | -2.502537000 | -1.317191000 |
| C | -3.288345000 | -2.504156000 | -0.661683000 |
| C | -2.822717000 | -1.331453000 | -0.047068000 |
| C | -3.599137000 | -0.156357000 | -0.083158000 |
| C | -4.833802000 | -0.162766000 | -0.740187000 |
| C | -5.291979000 | -1.331814000 | -1.356982000 |
| H | -4.880712000 | -3.407022000 | -1.795818000 |
| H | -2.673265000 | -3.395625000 | -0.618442000 |
| C | -1.518762000 | -1.324864000 | 0.624614000  |
| C | -3.138212000 | 1.090951000  | 0.597196000  |
| H | -5.417424000 | 0.750189000  | -0.750730000 |
| H | -6.250197000 | -1.331414000 | -1.865767000 |
| C | -1.836694000 | 1.055284000  | 1.260596000  |
| C | -1.006155000 | -0.036795000 | 1.228094000  |
| N | 0.252180000  | -0.203055000 | 1.738982000  |
| H | 0.517940000  | -1.186528000 | 1.758830000  |
| C | 1.288900000  | 0.726961000  | 2.007823000  |
| C | 1.498196000  | 1.867101000  | 1.214388000  |
| C | 2.190710000  | 0.427169000  | 3.042977000  |
| C | 2.581259000  | 2.711016000  | 1.471798000  |
| H | 0.828257000  | 2.091164000  | 0.394217000  |
| C | 3.281961000  | 1.260928000  | 3.295565000  |

|    |              |              |             |
|----|--------------|--------------|-------------|
| H  | 2.027766000  | -0.451445000 | 3.658486000 |
| C  | 3.457609000  | 2.396888000  | 2.508117000 |
| H  | 2.743138000  | 3.593105000  | 0.865034000 |
| H  | 3.975456000  | 1.033697000  | 4.095512000 |
| Cl | -1.433055000 | 2.540386000  | 2.207969000 |
| O  | -3.866816000 | 2.109509000  | 0.600522000 |
| O  | -0.801714000 | -2.349299000 | 0.719773000 |
| Cl | 4.875912000  | 3.496853000  | 2.838629000 |

**Coordinates for 1a-HMB**

|    |              |              |              |
|----|--------------|--------------|--------------|
| C  | 4.986937000  | -1.503622000 | 0.064869000  |
| C  | 3.917048000  | -1.165955000 | 0.900824000  |
| C  | 2.613513000  | -1.536298000 | 0.553681000  |
| C  | 2.387528000  | -2.250730000 | -0.638944000 |
| C  | 3.463427000  | -2.591717000 | -1.472947000 |
| C  | 4.761636000  | -2.216516000 | -1.121251000 |
| H  | 5.995945000  | -1.214271000 | 0.339459000  |
| H  | 4.070972000  | -0.625201000 | 1.826742000  |
| C  | 1.484154000  | -1.196394000 | 1.470942000  |
| C  | 1.021152000  | -2.630270000 | -1.014811000 |
| H  | 3.262332000  | -3.142405000 | -2.384662000 |
| H  | 5.593973000  | -2.476844000 | -1.766188000 |
| C  | -0.131178000 | -2.214377000 | -0.128035000 |
| C  | 0.145662000  | -1.612570000 | 1.076235000  |
| O  | 0.765712000  | -3.291797000 | -2.048969000 |
| O  | 1.715735000  | -0.587484000 | 2.544754000  |
| N  | -1.324853000 | -2.592014000 | -0.670606000 |
| Cl | -1.131376000 | -1.346084000 | 2.328985000  |
| C  | -2.651074000 | -2.121907000 | -0.461867000 |
| C  | -2.934456000 | -0.766471000 | -0.227691000 |
| C  | -4.264059000 | -0.352181000 | -0.109517000 |
| C  | -5.313507000 | -1.269042000 | -0.242968000 |

|   |              |              |              |                               |              |              |              |
|---|--------------|--------------|--------------|-------------------------------|--------------|--------------|--------------|
| C | -5.027019000 | -2.615632000 | -0.497448000 | H                             | -0.110606000 | 4.137399000  | -3.522146000 |
| C | -3.701984000 | -3.043317000 | -0.604233000 | H                             | 0.678206000  | 2.562312000  | -3.625660000 |
| H | -2.129899000 | -0.044578000 | -0.151590000 | H                             | -1.066628000 | 2.654869000  | -3.480893000 |
| H | -4.477669000 | 0.694317000  | 0.080207000  | C                             | -2.525452000 | 3.373115000  | -1.470690000 |
| H | -6.342543000 | -0.937417000 | -0.153146000 | H                             | -2.419041000 | 3.924742000  | -2.407466000 |
| H | -5.832479000 | -3.334732000 | -0.604938000 | H                             | -3.066408000 | 2.443461000  | -1.702833000 |
| H | -3.473518000 | -4.089533000 | -0.782760000 | H                             | -3.174116000 | 3.973568000  | -0.827574000 |
| H | -1.191759000 | -3.204270000 | -1.474093000 | <b>Coordinates for 1b-HMB</b> |              |              |              |
| C | 1.358534000  | 2.775718000  | 0.386658000  | C                             | -0.755618000 | 1.286175000  | 0.802077000  |
| C | 0.195779000  | 2.816660000  | 1.188079000  | C                             | 0.382300000  | 2.092338000  | 1.226184000  |
| C | -1.074025000 | 2.970535000  | 0.585559000  | C                             | 1.425802000  | 2.401441000  | 0.202156000  |
| C | -1.174964000 | 3.115085000  | -0.818308000 | C                             | 1.342888000  | 1.874392000  | -1.101295000 |
| C | -0.011253000 | 3.051528000  | -1.620946000 | C                             | 0.198618000  | 1.037266000  | -1.478811000 |
| C | 1.259073000  | 2.919227000  | -1.015520000 | C                             | -0.919324000 | 0.827854000  | -0.482569000 |
| C | -2.318708000 | 2.956948000  | 1.459512000  | H                             | 2.557533000  | 3.598938000  | 1.564686000  |
| H | -2.432155000 | 3.887823000  | 2.033286000  | C                             | 2.511397000  | 3.210398000  | 0.554142000  |
| H | -3.231609000 | 2.826417000  | 0.876147000  | C                             | 2.342838000  | 2.162333000  | -2.042735000 |
| H | -2.282426000 | 2.136151000  | 2.183338000  | C                             | 3.420735000  | 2.975127000  | -1.686437000 |
| C | 0.332721000  | 2.709610000  | 2.696617000  | C                             | 3.504913000  | 3.497381000  | -0.387597000 |
| H | -0.562847000 | 3.052733000  | 3.216738000  | H                             | 2.255132000  | 1.748074000  | -3.040436000 |
| H | 0.526770000  | 1.675488000  | 3.012712000  | H                             | 4.191140000  | 3.202964000  | -2.415302000 |
| H | 1.168118000  | 3.317891000  | 3.060533000  | H                             | 4.343438000  | 4.127916000  | -0.110644000 |
| C | 2.707452000  | 2.562714000  | 1.052032000  | N                             | -1.948172000 | 0.121815000  | -1.038444000 |
| H | 3.123063000  | 3.500441000  | 1.450876000  | Cl                            | -1.899645000 | 0.836696000  | 2.130030000  |
| H | 2.625321000  | 1.863075000  | 1.888598000  | O                             | 0.097076000  | 0.499359000  | -2.608118000 |
| H | 3.444118000  | 2.149678000  | 0.359288000  | O                             | 0.512157000  | 2.516258000  | 2.398772000  |
| C | 2.521787000  | 2.961965000  | -1.861955000 | C                             | -5.408109000 | 1.055645000  | 0.025006000  |
| H | 3.336134000  | 3.465640000  | -1.333578000 | C                             | -4.035955000 | 1.154432000  | -0.202478000 |
| H | 2.882829000  | 1.957463000  | -2.128759000 | C                             | -3.329074000 | 0.050159000  | -0.706375000 |
| H | 2.366350000  | 3.508349000  | -2.794663000 | C                             | -4.023007000 | -1.132691000 | -1.001380000 |
| C | -0.132832000 | 3.107099000  | -3.136502000 | C                             | -5.399280000 | -1.213668000 | -0.779488000 |

|   |              |              |              |                               |              |              |              |
|---|--------------|--------------|--------------|-------------------------------|--------------|--------------|--------------|
| C | -6.116687000 | -0.127227000 | -0.253925000 | C                             | -0.026857000 | -3.001792000 | 1.715555000  |
| H | -5.940940000 | 1.917438000  | 0.416601000  | H                             | 0.275527000  | -3.431801000 | 2.674597000  |
| H | -3.517719000 | 2.084218000  | -0.001951000 | H                             | -0.786314000 | -2.235871000 | 1.930389000  |
| H | -3.481253000 | -1.987057000 | -1.395535000 | H                             | -0.518221000 | -3.798493000 | 1.152119000  |
| H | -5.921686000 | -2.136912000 | -1.011905000 | C                             | 0.038941000  | -3.088080000 | -1.217349000 |
| C | -7.601603000 | -0.221693000 | 0.015968000  | H                             | 0.046021000  | -4.187589000 | -1.253977000 |
| H | -7.811277000 | -0.235561000 | 1.093992000  | H                             | -0.909405000 | -2.787151000 | -0.761871000 |
| H | -8.141967000 | 0.634305000  | -0.405596000 | H                             | 0.026478000  | -2.728842000 | -2.248624000 |
| H | -8.028173000 | -1.133337000 | -0.413871000 | H                             | -1.685477000 | -0.271509000 | -1.940236000 |
| C | 1.165879000  | -2.436303000 | 0.962468000  | <b>Coordinates for 1c-HMB</b> |              |              |              |
| C | 2.228701000  | -1.835576000 | 1.673945000  | C                             | -1.624917000 | 5.298437000  | 0.678042000  |
| C | 3.378563000  | -1.391441000 | 0.982235000  | C                             | -0.541058000 | 4.618753000  | 1.237572000  |
| C | 3.441598000  | -1.492459000 | -0.426313000 | C                             | -0.038828000 | 3.467783000  | 0.610404000  |
| C | 2.372677000  | -2.080900000 | -1.140294000 | C                             | -0.629022000 | 2.991940000  | -0.576645000 |
| C | 1.223660000  | -2.527875000 | -0.446479000 | C                             | -1.713160000 | 3.679115000  | -1.132187000 |
| C | 2.453552000  | -2.251303000 | -2.648591000 | C                             | -2.208418000 | 4.828477000  | -0.507096000 |
| H | 2.017175000  | -3.203429000 | -2.965228000 | H                             | -2.013137000 | 6.189037000  | 1.160283000  |
| H | 1.912814000  | -1.453506000 | -3.178570000 | H                             | -0.070122000 | 4.961334000  | 2.151767000  |
| H | 3.485491000  | -2.245985000 | -3.004250000 | C                             | 1.111702000  | 2.762645000  | 1.185698000  |
| C | 4.649469000  | -0.945183000 | -1.170327000 | C                             | -0.134433000 | 1.745593000  | -1.236796000 |
| H | 5.421619000  | -1.711922000 | -1.332840000 | H                             | -2.153301000 | 3.296250000  | -2.045193000 |
| H | 4.373474000  | -0.551559000 | -2.151865000 | H                             | -3.050656000 | 5.356181000  | -0.942277000 |
| H | 5.119090000  | -0.123861000 | -0.624175000 | C                             | 1.010611000  | 1.075596000  | -0.638795000 |
| C | 4.555825000  | -0.820874000 | 1.756446000  | C                             | 1.674128000  | 1.556335000  | 0.466177000  |
| H | 5.508466000  | -1.075317000 | 1.283673000  | N                             | 2.779445000  | 1.080122000  | 1.107259000  |
| H | 4.511714000  | 0.276105000  | 1.829661000  | C                             | 3.832789000  | 0.228727000  | 0.666330000  |
| H | 4.593408000  | -1.210494000 | 2.776115000  | C                             | 4.365472000  | -0.699259000 | 1.569418000  |
| C | 2.123549000  | -1.643944000 | 3.177912000  | C                             | 5.457227000  | -1.497749000 | 1.213621000  |
| H | 2.609902000  | -0.718397000 | 3.497443000  | C                             | 6.018588000  | -1.368918000 | -0.063585000 |
| H | 1.082989000  | -1.578431000 | 3.502677000  | C                             | 5.494965000  | -0.432596000 | -0.969534000 |
| H | 2.589991000  | -2.467994000 | 3.738382000  | C                             | 4.417167000  | 0.366315000  | -0.606538000 |

|    |              |              |              |                               |              |              |              |
|----|--------------|--------------|--------------|-------------------------------|--------------|--------------|--------------|
| H  | 3.914974000  | -0.809245000 | 2.550702000  | H                             | -5.536412000 | 0.405194000  | 1.941349000  |
| H  | 5.846842000  | -2.210877000 | 1.929036000  | H                             | -5.471723000 | 1.108523000  | 0.331702000  |
| H  | 5.953842000  | -0.345518000 | -1.946868000 | C                             | -4.303420000 | 0.338206000  | -1.710587000 |
| H  | 4.029261000  | 1.099268000  | -1.303429000 | H                             | -5.370464000 | 0.556095000  | -1.836449000 |
| H  | 2.918474000  | 1.542609000  | 2.004331000  | H                             | -3.833530000 | 1.243615000  | -1.302322000 |
| Cl | 1.453073000  | -0.499280000 | -1.410697000 | H                             | -3.883701000 | 0.186248000  | -2.704479000 |
| O  | 7.095248000  | -2.113490000 | -0.527205000 | C                             | -2.448964000 | -1.785176000 | -2.516053000 |
| C  | 7.669368000  | -3.129040000 | 0.337458000  | H                             | -1.683469000 | -2.555135000 | -2.613459000 |
| H  | 6.927448000  | -3.892678000 | 0.598934000  | H                             | -3.108644000 | -1.870472000 | -3.391632000 |
| H  | 8.081359000  | -2.686832000 | 1.252302000  | H                             | -1.933589000 | -0.821059000 | -2.586220000 |
| H  | 8.471369000  | -3.579371000 | -0.245822000 | O                             | 1.658513000  | 3.124778000  | 2.254683000  |
| C  | -4.771768000 | -0.950946000 | 0.422970000  | O                             | -0.722578000 | 1.308395000  | -2.256608000 |
| C  | -4.609408000 | -2.086956000 | 1.246388000  | <b>Coordinates for 1d-HMB</b> |              |              |              |
| C  | -3.727435000 | -3.120246000 | 0.857273000  | C                             | -0.674660000 | -1.032455000 | -0.419102000 |
| C  | -3.058260000 | -3.046291000 | -0.385959000 | C                             | 0.424498000  | -1.404062000 | -1.388248000 |
| C  | -3.220176000 | -1.909013000 | -1.211625000 | C                             | 1.645803000  | -2.034190000 | -0.875387000 |
| C  | -4.087443000 | -0.866965000 | -0.810322000 | C                             | 1.830245000  | -2.173811000 | 0.513713000  |
| C  | -3.484095000 | -4.298794000 | 1.787429000  | C                             | 0.815192000  | -1.654693000 | 1.479024000  |
| H  | -4.087548000 | -5.178067000 | 1.516810000  | C                             | -0.423856000 | -1.117866000 | 0.927698000  |
| H  | -2.435942000 | -4.611629000 | 1.771753000  | H                             | 2.453061000  | -2.390729000 | -2.832357000 |
| H  | -3.722305000 | -4.050656000 | 2.823724000  | C                             | 2.618391000  | -2.510476000 | -1.767836000 |
| C  | -2.178591000 | -4.197161000 | -0.849776000 | C                             | 2.987579000  | -2.791254000 | 0.999594000  |
| H  | -1.108105000 | -3.966581000 | -0.752104000 | C                             | 3.951661000  | -3.272638000 | 0.106802000  |
| H  | -2.368375000 | -5.110833000 | -0.284328000 | C                             | 3.768145000  | -3.132557000 | -1.276288000 |
| H  | -2.359171000 | -4.434387000 | -1.903210000 | H                             | 3.111255000  | -2.883924000 | 2.072215000  |
| C  | -5.397455000 | -2.203234000 | 2.541456000  | H                             | 4.844725000  | -3.756325000 | 0.488498000  |
| H  | -5.707200000 | -3.234798000 | 2.733166000  | H                             | 4.517057000  | -3.507897000 | -1.965310000 |
| H  | -4.815684000 | -1.873180000 | 3.415376000  | O                             | 0.238628000  | -1.185249000 | -2.609882000 |
| H  | -6.307469000 | -1.599992000 | 2.515142000  | O                             | 1.048106000  | -1.690243000 | 2.710530000  |
| C  | -5.673809000 | 0.185351000  | 0.877311000  | N                             | -1.783980000 | -0.593109000 | -1.086401000 |
| H  | -6.739005000 | -0.049181000 | 0.733194000  | H                             | -1.586522000 | -0.441388000 | -2.074058000 |

|    |              |              |              |                               |              |              |              |
|----|--------------|--------------|--------------|-------------------------------|--------------|--------------|--------------|
| Cl | -1.576359000 | -0.468292000 | 2.161486000  | H                             | -1.174841000 | 2.652653000  | 1.872608000  |
| C  | -5.863223000 | -0.373450000 | -0.151695000 | H                             | -0.042393000 | 3.891791000  | 2.416914000  |
| C  | -5.121528000 | -1.421593000 | 0.382967000  | H                             | -0.946615000 | 4.133171000  | 0.934837000  |
| C  | -3.757368000 | -1.497888000 | 0.096176000  | C                             | -0.596293000 | 3.180445000  | -1.396535000 |
| C  | -3.148844000 | -0.513983000 | -0.702008000 | H                             | -1.499195000 | 3.028959000  | -0.799406000 |
| C  | -3.925889000 | 0.529892000  | -1.233539000 | H                             | -0.540488000 | 4.253206000  | -1.634258000 |
| C  | -5.293359000 | 0.602688000  | -0.962191000 | H                             | -0.744593000 | 2.650860000  | -2.341526000 |
| H  | -5.607182000 | -2.166649000 | 1.000509000  | C                             | 1.710405000  | 2.189025000  | -2.925765000 |
| H  | -3.452321000 | 1.289577000  | -1.846176000 | H                             | 1.279937000  | 1.266770000  | -3.344789000 |
| H  | -5.905980000 | 1.401784000  | -1.360361000 | H                             | 1.123739000  | 3.027589000  | -3.309129000 |
| H  | -3.171341000 | -2.321457000 | 0.483672000  | H                             | 2.716532000  | 2.293322000  | -3.339773000 |
| F  | -7.224412000 | -0.302477000 | 0.128388000  | <b>Coordinates for 1e-HMB</b> |              |              |              |
| C  | 0.642886000  | 2.682879000  | -0.668765000 | C                             | 0.410269000  | -0.998787000 | -0.377600000 |
| C  | 1.732548000  | 2.164808000  | -1.406250000 | C                             | -0.681465000 | -1.456756000 | -1.316137000 |
| C  | 2.856376000  | 1.639455000  | -0.727862000 | C                             | -1.887547000 | -2.075752000 | -0.756447000 |
| C  | 2.900597000  | 1.655398000  | 0.683809000  | C                             | -2.077932000 | -2.098792000 | 0.638865000  |
| C  | 1.808140000  | 2.168114000  | 1.421621000  | C                             | -1.087794000 | -1.461054000 | 1.557790000  |
| C  | 0.697044000  | 2.721832000  | 0.743635000  | C                             | 0.152470000  | -0.964848000 | 0.969523000  |
| C  | 4.134455000  | 1.142429000  | 1.407563000  | H                             | -2.668768000 | -2.629075000 | -2.678719000 |
| H  | 4.151749000  | 0.044683000  | 1.468971000  | C                             | -2.837942000 | -2.658973000 | -1.608471000 |
| H  | 5.052674000  | 1.451386000  | 0.897799000  | C                             | -3.218195000 | -2.709016000 | 1.171517000  |
| H  | 4.192228000  | 1.521791000  | 2.429040000  | C                             | -4.158897000 | -3.298836000 | 0.319879000  |
| C  | 4.009815000  | 1.048386000  | -1.521103000 | C                             | -3.970038000 | -3.274093000 | -1.069254000 |
| H  | 4.722288000  | 1.820075000  | -1.849225000 | H                             | -3.349092000 | -2.710712000 | 2.247222000  |
| H  | 4.571450000  | 0.316916000  | -0.936574000 | H                             | -5.038357000 | -3.776995000 | 0.738318000  |
| H  | 3.657080000  | 0.533862000  | -2.419337000 | H                             | -4.700787000 | -3.733765000 | -1.725952000 |
| C  | 1.828127000  | 2.086124000  | 2.939136000  | N                             | 1.521896000  | -0.607614000 | -1.073688000 |
| H  | 2.140558000  | 1.090464000  | 3.271534000  | Cl                            | 1.287213000  | -0.186000000 | 2.141898000  |
| H  | 2.518778000  | 2.814688000  | 3.387681000  | O                             | -0.503043000 | -1.315413000 | -2.550546000 |
| H  | 0.842726000  | 2.260937000  | 3.371512000  | O                             | -1.339085000 | -1.366918000 | 2.782730000  |
| C  | -0.425648000 | 3.379917000  | 1.530063000  | C                             | 5.612378000  | -0.363684000 | -0.161887000 |



|    |              |              |              |   |              |             |              |
|----|--------------|--------------|--------------|---|--------------|-------------|--------------|
| C  | 5.052734000  | 0.522404000  | -1.079865000 | C | 0.522844000  | 3.494495000 | 0.301312000  |
| C  | 3.683767000  | 0.444715000  | -1.344207000 | H | 1.354757000  | 2.810204000 | 0.520984000  |
| C  | 2.885376000  | -0.514986000 | -0.698324000 | H | 0.803294000  | 4.082860000 | -0.575530000 |
| C  | 3.476792000  | -1.410966000 | 0.208052000  | H | 0.453296000  | 4.194901000 | 1.137504000  |
| C  | 4.843421000  | -1.328451000 | 0.485170000  | C | -3.770534000 | 1.573981000 | 2.182814000  |
| H  | 5.667982000  | 1.264060000  | -1.573763000 | H | -3.498091000 | 0.637899000 | 2.692377000  |
| H  | 3.227992000  | 1.137592000  | -2.044037000 | H | -3.686236000 | 2.374175000 | 2.923970000  |
| H  | 2.878565000  | -2.175000000 | 0.687825000  | H | -4.824315000 | 1.506956000 | 1.905532000  |
| H  | 5.301302000  | -2.014500000 | 1.186715000  | C | -1.167326000 | 2.738393000 | 2.610415000  |
| H  | 1.324137000  | -0.518855000 | -2.068880000 | H | -0.090272000 | 2.893874000 | 2.676747000  |
| Cl | 7.399487000  | -0.262539000 | 0.195807000  | H | -1.658004000 | 3.631204000 | 3.025719000  |
| C  | -0.788240000 | 2.754849000  | 0.086465000  | H | -1.404617000 | 1.899834000 | 3.272664000  |
| C  | -1.195279000 | 2.387195000  | -1.216238000 | C | -4.626345000 | 0.789169000 | -0.534939000 |
| C  | -2.458785000 | 1.784610000  | -1.424741000 | H | -4.887990000 | 0.158341000 | 0.317660000  |
| C  | -3.294700000 | 1.491788000  | -0.322564000 | H | -5.452423000 | 1.501341000 | -0.678385000 |
| C  | -2.877846000 | 1.839139000  | 0.982860000  | H | -4.605313000 | 0.136754000 | -1.410663000 |
| C  | -1.617626000 | 2.448173000  | 1.189268000  | C | -2.902292000 | 1.478909000 | -2.845707000 |
| C  | -0.282562000 | 2.610710000  | -2.410633000 | H | -2.468888000 | 0.538434000 | -3.217870000 |
| H  | -0.541057000 | 3.522059000  | -2.970076000 | H | -3.987583000 | 1.398753000 | -2.928778000 |
| H  | 0.764199000  | 2.701797000  | -2.112785000 | H | -2.589211000 | 2.268356000 | -3.536282000 |
| H  | -0.346917000 | 1.775400000  | -3.115650000 |   |              |             |              |
